# Supplementary material for: QGeoSEP: A Novel Multitask Learning Framework Integrating Semantic Features for Collaborative Prediction of Multiple Properties of EMs
Source: Research Square preprint supplement (doi:10.21203/rs.3.rs-7224644/v1), 2025-11-04
Supplement: Supplementary file 1 [file 1a0d523c4c12e8c31480b8ac.xlsx]

## Sheet: Information
QGeoSEP: A Novel Multitask Learning Framework Integrating Quantum, Geometric, and Semantic Features for Collaborative Prediction of Multiple Properties of Energetic Molecules Mingchi Gao 1,2‡ Zhijiang Yang2‡ Tengxin Huang2 Mingtian Li1 Yingjun Zhang1* Liangliang Wang2* Junjie Ding2* 1. School of Materials Science and Engineering, Sichuan University of Science and Engineering, Zigong, 643000, Chin…

## Sheet: 661 EMs
ID	SMILES	decomposition (K)	decomposition_pred	density (g/cm-3)	density_pred
1	O=[N+]([O-])N1CN([N+](=O)[O-])CN([N+](=O)[O-])C1	503.15	473.928	1.82	1.84024
2	CCCCCCC/C=N/n1nnnc1N=[N+]=[N-]	435.15	445.445	1.18	1.25858
3	CCOC(=O)[C@]12NC(=O)N([N+](=O)[O-])[C@]1(C(=O)OCC)NC(=O)N2[N+](=O)[O-]	478.15	453.238	1.584	1.64598
4	CCOC(=O)C(N=[N+]=[N-])(N=[N+]=[N-])C(=O)OCC	420.15	451.273	1.2	1.34637
5	C=CCn1nnc(CCc2nnn(CC=C)n2)n1	503.15	484.52	1.2	1.293
6	C=CCn1nnc(CCc2nnnn2CC=C)n1	503.15	484.96	1.2	1.31023
7	CCCCN(CCO[N+](=O)[O-])[N+](=O)[O-]	485.75	447.28	1.211	1.2327
8	Cc1cc(C)n(C(=NN)n2nc(C)cc2C)n1	472.5	475.558	1.224	1.26338
9	CC(C)(C)OO[C@@H](N=[N+]=[N-])c1ccc([C@H](N=[N+]=[N-])OOC(C)(C)C)cc1	402.15	430.288	1.24	1.14709
10	Cc1cno[n+]1[O-]	453.15	495.508	1.24	1.24551
11	CC(C)(C)OO[C@@H](N=[N+]=[N-])c1ccccc1[C@@H](N=[N+]=[N-])OOC(C)(C)C	392.15	424.735	1.248	1.16017
12	CC(C)=Nn1nnnc1-n1cc(-c2ccc(C(C)(C)C)cc2)nn1	437.15	481.7	1.27	1.28974
13	O=[N+]([O-])OC[C@@]12C[C@@H]3[C@H]4[C@H]5C[C@@H]3[C@]1(CO[N+](=O)[O-])[C@H]5[C@H]42	413.15	449.246	1.29	1.48237
14	CN(C)/N=N/N(C)C=O	455.65	471.475	1.292	1.15078
15	CCCNC(=N)N[N+](=O)[O-]	502.35	468.676	1.3	1.22729
16	CCN(CCN=[N+]=[N-])[N+](=O)[O-]	451.15	457.74	1.32	1.29078
17	[N-]=[N+]=NC[C@@]12C[C@@H]3[C@H]4[C@H]5C[C@@H]3[C@]1(CN=[N+]=[N-])[C@H]5[C@H]42	467.15	451.283	1.32	1.42202
18	CN(CCO[N+](=O)[O-])[N+](=O)[O-]	487.55	481.045	1.32	1.33787
19	C=CCn1nnc(/N=N/Nc2nnn(CC=C)n2)n1	480.15	480.431	1.324	1.49623
20	[N-]=[N+]=NCC(=O)OCC(CN=[N+]=[N-])(CN=[N+]=[N-])CN=[N+]=[N-]	443.15	458.715	1.326	1.43342
21	O=[N+]([O-])OC1COC1	426.15	463.623	1.34	1.35251
22	CN(CCN=[N+]=[N-])[N+](=O)[O-]	453.15	464.369	1.343	1.32364
23	Cc1cc(C)n(C2=NNC(n3nc(C)cc3C)=NN2)n1	508.8	508.273	1.367	1.39336
24	C[Si](C)(COC(=O)N[N+](=O)[O-])O[Si](C)(C)COC(=O)N[N+](=O)[O-]	423.15	428.342	1.37	1.29156
25	[O-][n+]1c(Cn2ccnn2)cccc1Cn1ccnn1	501.15	493.492	1.38	1.42116
26	CN(C=O)/N=N/N(C)C=O	474.55	459.451	1.396	1.27701
27	CCOC(=O)CN(CC([N+](=O)[O-])([N+](=O)[O-])[N+](=O)[O-])[N+](=O)[O-]	445.15	457.86	1.4	1.56757
28	C=Cn1nnc(CCc2nnnn2C=C)n1	459.15	484.49	1.4	1.44983
29	C=Cn1nnc(CCc2nnn(C=C)n2)n1	463.15	485.401	1.4	1.4367
30	CCOC(=O)c1nnnn1CCn1nnnc1C(=O)OCC	485.15	454.385	1.4	1.5669
31	Cc1cn(-n2ccnn2)nn1	474.75	500.552	1.414	1.57652
32	[N-]=[N+]=NC[C@H](N=[N+]=[N-])[C@@H](CN=[N+]=[N-])N=[N+]=[N-]	437.05	470.501	1.42	1.53621
33	O=C(OO)c1ccc(C(=O)OO)cc1	433.15	469.832	1.423	1.44724
34	Cc1cc(C)n(-c2nnc(NN=Cc3ccc(O)cc3)nn2)n1	504.15	537.234	1.432	1.44431
35	CN(CC(N)=O)[N+](=O)[O-]	459.15	458.293	1.44	1.33953
36	Nc1nnnn1Nc1ccccc1	466.15	491.338	1.44	1.45017
37	CC(C)=Nn1nnnc1-n1cc(-c2ccc(F)cc2)nn1	450.15	491.41	1.45	1.50321
38	[N-]=[N+]=NCCN(CCO[N+](=O)[O-])[N+](=O)[O-]	445.15	440.12	1.46	1.52772
39	CC(C)(C)N1CNC(=C([N+](=O)[O-])[N+](=O)[O-])NC1	453.85	475.681	1.46	1.33897
40	O=[N+]([O-])OCC1(CO[N+](=O)[O-])CCCC1	463.15	457.989	1.464	1.32636
41	Cc1cc(C)n(-c2nnc(NN=Cc3ccc([N+](=O)[O-])cc3[N+](=O)[O-])nn2)n1	490.25	530.14	1.477	1.57862
42	CN(CC(=O)OCC([N+](=O)[O-])([N+](=O)[O-])[N+](=O)[O-])[N+](=O)[O-]	451.15	466.329	1.48	1.61538
43	O=[N+]([O-])OCC(COCC(CO[N+](=O)[O-])(CO[N+](=O)[O-])CO[N+](=O)[O-])(CO[N+](=O)[O-])CO[N+](=O)[O-]	444.35	448.746	1.488	1.61206
44	C[Si](C)(COC(=O)N[N+](=O)[O-])COC(=O)N[N+](=O)[O-]	415.15	430.261	1.49	1.38897
45	CN(N=Nc1nnn(C)n1)c1nnn(C)n1	468.15	487.547	1.5	1.601
46	Cc1cc2cc(c1)[nH]c(=O)[nH][nH]c1nnc(nn1)[nH][nH]c(=O)[nH]c1cc(C)cc(c1)[nH]c(=O)[nH][nH]c1nnc(nn1)[nH][nH]c(=O)[nH]2	507.35	531.638	1.5	1.60046
47	Cc1cc(C)n(-c2nnc(Nc3nncn3N)nn2)n1	549.65	515.966	1.5	1.67337
48	Cc1cc(C)n(-c2nnc(=O)[nH]n2)n1	479.15	518.379	1.501	1.60495
49	O=C(OOC(=O)c1cc([N+](=O)[O-])cc([N+](=O)[O-])c1)c1ccc(C(=O)OOC(=O)c2cc([N+](=O)[O-])cc([N+](=O)[O-])c2)cc1	436.15	477.822	1.51	1.63647
50	CN(c1nnn(C)n1)c1nnn(C)n1	509.15	489.314	1.512	1.5774
51	COC(=O)Cn1nnc(N=NNc2nnn(CC(=O)OC)n2)n1	442.15	478.911	1.523	1.66223
52	CN(CNc1nnnn1C)[N+](=O)[O-]	457.15	483.472	1.525	1.59215
53	C#CCNC(N)=N[N+](=O)[O-]	471.25	472.853	1.526	1.33757
54	[N-]=[N+]=NCC(CN=[N+]=[N-])(CN=[N+]=[N-])CO[N+](=O)[O-]	448.15	459.43	1.53	1.47006
55	COc1c(Cn2ccnn2)cc([N+](=O)[O-])cc1[N+](=O)[O-]	482.15	473.507	1.53	1.50774
56	O=[N+]([O-])c1ccc(Cn2ccnn2)c([N+](=O)[O-])c1	493.15	471.191	1.53	1.55929
57	Cc1ccc(-n2ccnn2)cc1C(F)(F)F	501.15	473.707	1.53	1.33043
58	Cn1nnc(/N=N/Nc2nnn(C)n2)n1	456.15	495.87	1.532	1.71499
59	CCOCNc1nc(NCOCC)c([N+](=O)[O-])nc1[N+](=O)[O-]	497.15	458.048	1.533	1.41095
60	CN(CNC(=O)NCN(C)[N+](=O)[O-])[N+](=O)[O-]	435.15	443.796	1.54	1.43863
61	COc1c([N+](=O)[O-])cc(Cn2ccnn2)cc1[N+](=O)[O-]	443.15	474.49	1.54	1.51795
62	CCOC(=O)CNC(=O)OCC([N+](=O)[O-])([N+](=O)[O-])[N+](=O)[O-]	450.15	438.47	1.54	1.55081
63	CN(C)c1n[n+]([O-])c([N+](=O)[O-])c(N(C)C)c1[N+](=O)[O-]	490.15	472.714	1.54	1.52757
64	FC(F)(F)c1cc(-n2nccn2)c(-n2ccnn2)c(-n2nccn2)c1	526.15	483.307	1.54	1.6789
65	O=[N+]([O-])OC[C@H]1[C@H](CO[N+](=O)[O-])[C@@H](CO[N+](=O)[O-])[C@H]1CO[N+](=O)[O-]	459.95	447.298	1.543	1.54421
66	CN(CNC(=O)OCN(C)[N+](=O)[O-])[N+](=O)[O-]	453.15	447.919	1.55	1.42956
67	CN(CC(=O)NNC(=O)CN(C)[N+](=O)[O-])[N+](=O)[O-]	474.15	440.466	1.55	1.52982
68	Cc1c(C=NNC(=N)NN=Cc2no[n+]([O-])c2C)no[n+]1[O-]	504.85	491.401	1.557	1.73348
69	CN(/N=N/c1nnnn1C)c1nnnn1C	473.15	485.874	1.559	1.62064
70	[N-]=[N+]=N[C@@]1([N+](=O)[O-])COCN([N+](=O)[O-])C1	431.15	460.087	1.56	1.64254
71	[N-]=[N+]=Nc1nnnn1N=CCCC/C=N/n1nnnc1N=[N+]=[N-]	435.15	471.332	1.56	1.67012
72	Cc1cc(-n2cnnn2)c([N+](=O)[O-])cc1[N+](=O)[O-]	441.15	480.032	1.56	1.64481
73	Nn1cnc([N+](=O)[O-])c1	510.15	470.326	1.56	1.65718
74	COCNc1nc(NCOC)c([N+](=O)[O-])nc1[N+](=O)[O-]	496.15	480.175	1.562	1.49816
75	Cc1nnnn1N=Cc1no[n+]([O-])c1C	470.75	495.759	1.563	1.63674
76	O=[N+]([O-])c1cc(C=NO)ccc1O	471.15	473.708	1.564	1.47151
77	O=[N+]([O-])OCCc1cc(-c2cc(CCO[N+](=O)[O-])on2)no1	473.65	456.067	1.565	1.52479
78	Cc1cc(C)n(-c2nnc(Nc3c([N+](=O)[O-])cc([N+](=O)[O-])cc3[N+](=O)[O-])nn2)n1	493.15	494.827	1.566	1.67671
79	O=[N+]([O-])OCCc1onc(-c2noc(CCO[N+](=O)[O-])c2CCO[N+](=O)[O-])c1CCO[N+](=O)[O-]	461.45	440.272	1.568	1.56077
80	O=C(NCCO[N+](=O)[O-])C(=O)NCCO[N+](=O)[O-]	455.15	412.679	1.57	1.45745
81	CC(COC(N)=O)([N+](=O)[O-])[N+](=O)[O-]	465.15	446.043	1.57	1.4899
82	Nn1cc([N+](=O)[O-])cn1	468.15	475.282	1.57	1.68254
83	Cn1nnc(N=[N+]([O-])c2nnn(C)n2)n1	481.15	490.806	1.57	1.76597
84	Cc1c(C=NNC(=N/N=C/c2no[n+]([O-])c2C)NN=Cc2no[n+]([O-])c2C)no[n+]1[O-]	488.45	500.661	1.57	1.66062
85	[N-]=[N+]=NCc1onc(-c2noc(CN=[N+]=[N-])c2CN=[N+]=[N-])c1CN=[N+]=[N-]	465.15	463.184	1.571	1.59062
86	CN(CC(=O)O)[N+](=O)[O-]	426.15	434.392	1.58	1.40876
87	O=[N+]([O-])c1cccc(-c2c([N+](=O)[O-])no[n+]2[O-])c1	448.15	462.013	1.58	1.64867
88	CCOC(=O)CN(C(=O)OCC([N+](=O)[O-])([N+](=O)[O-])[N+](=O)[O-])[N+](=O)[O-]	463.15	448.239	1.58	1.60074
89	O=[N+]([O-])c1ccc(Cn2ccnn2)cc1[N+](=O)[O-]	488.15	469.007	1.58	1.53799
90	NC(=O)OCC(F)([N+](=O)[O-])[N+](=O)[O-]	492.15	449.286	1.58	1.61302
91	COc1ccc([N+](=O)[O-])c(-n2ccnn2)c1[N+](=O)[O-]	494.15	479.22	1.58	1.58378
92	O=C1NCCCCCCNC(=O)NNc2nnc(nn2)NNC(=O)NCCCCCCNC(=O)NNc2nnc(nn2)NN1	495.05	524.909	1.58	1.42727
93	C[Si](C)(C)COC(=O)N[N+](=O)[O-]	428.15	454.258	1.19	1.13583
94	O=[N+]([O-])OCc1cc(-c2cc(CO[N+](=O)[O-])on2)no1	462.35	462.625	1.585	1.60822
95	[N-]=[N+]=NCC(CN=[N+]=[N-])(CO[N+](=O)[O-])CO[N+](=O)[O-]	455.15	453.782	1.586	1.53989
96	[N-]=[N+]=Nc1nnnn1N=CCC/C=N/n1nnnc1N=[N+]=[N-]	441.15	473.941	1.59	1.7182
97	[N-]=[N+]=NCCn1nnc(N=[N+]([O-])c2nnn(CCN=[N+]=[N-])n2)n1	462.15	478.705	1.59	1.76597
98	N#Cc1no[n+]([O-])c1C#N	477.15	476.763	1.59	1.58801
99	O=C1CC(=O)OCC([N+](=O)[O-])([N+](=O)[O-])CO1	496.15	465.277	1.59	1.5677
100	c1cc(-n2cnnn2)nc(-n2cnnn2)c1	497.15	515.306	1.59	1.69738
101	COc1cc(-n2ccnn2)c([N+](=O)[O-])cc1[N+](=O)[O-]	503.15	481.911	1.59	1.57469
102	c1nnc(Nc2ncn[nH]2)nn1	541.15	533.474	1.59	1.71084
103	CN(CN(c1nnn(C)n1)[N+](=O)[O-])[N+](=O)[O-]	457.15	464.106	1.592	1.67092
104	CN(CN(c1nnnn1C)[N+](=O)[O-])[N+](=O)[O-]	457.15	467.211	1.594	1.67765
105	O=[N+]([O-])c1cccc(-c2no[n+]([O-])c2[N+](=O)[O-])c1	435.15	466.867	1.6	1.65781
106	CCSC(=O)NCC([N+](=O)[O-])([N+](=O)[O-])[N+](=O)[O-]	440.15	440.456	1.6	1.56038
107	N/N=C(\N)c1nonc1N	471.55	495.458	1.6	1.71489
108	[N-]=[N+]=NC(=O)NC(=O)OC1COC1	408.15	429.987	1.604	1.61442
109	[N-]=[N+]=NCCn1nnnc1/N=N/c1nnnn1CCN=[N+]=[N-]	461.15	480.27	1.605	1.76456
110	O=[N+]([O-])OC[C@H]1[C@H](CO[N+](=O)[O-])[C@@H](CO[N+](=O)[O-])[C@@H]1CO[N+](=O)[O-]	472.85	447.298	1.605	1.54421
111	Cc1c([N+](=O)[O-])c(C)c([N+](=O)[O-])c(C(=O)O)c1[N+](=O)[O-]	500.15	498.932	1.605	1.60653
112	CN(CN(c1nnn(CN(C)[N+](=O)[O-])n1)[N+](=O)[O-])[N+](=O)[O-]	457.15	464.086	1.606	1.70431
113	O=[N+]([O-])O[C@H]1CC[C@@H]2[C@H](O[N+](=O)[O-])CC[C@H]1N2[N+](=O)[O-]	423.15	458.56	1.61	1.51446
114	O=[N+]([O-])C1([N+](=O)[O-])CN(CN2CC([N+](=O)[O-])([N+](=O)[O-])C2)C1	423.64	455.205	1.61	1.69707
115	O=C(N[N+](=O)[O-])OCCNC(=O)C(=O)NCCOC(=O)N[N+](=O)[O-]	448.15	433.63	1.61	1.57232
116	O=C1OCC([N+](=O)[O-])([N+](=O)[O-])COC1=O	474.15	460.584	1.61	1.62337
117	Cc1c(C=NNc2nncn2N)no[n+]1[O-]	481.15	499.119	1.61	1.77751
118	COc1cc(Cn2cc([N+](=O)[O-])nn2)c([N+](=O)[O-])cc1[N+](=O)[O-]	510.15	477.034	1.61	1.63943
119	CN(Cn1cnnn1)[N+](=O)[O-]	457.15	477.858	1.612	1.60858
120	[N-]=[N+]=NC[C@H](O[N+](=O)[O-])[C@@H](CN=[N+]=[N-])O[N+](=O)[O-]	420.55	461.256	1.62	1.626
121	Cn1nc([N+](=O)[O-])nc1N=[N+]=[N-]	434.15	467.534	1.62	1.64107
122	CN=[N+]([O-])c1nonc1N(CN(c1nonc1/[N+]([O-])=N/C)[N+](=O)[O-])[N+](=O)[O-]	435.15	458.637	1.62	1.81237
123	O=C(O)CCN(C(=O)C(=O)N(CCC(=O)O)[N+](=O)[O-])[N+](=O)[O-]	461.15	421.781	1.62	1.7124
124	Cc1c(-n2cnnn2)cc([N+](=O)[O-])cc1[N+](=O)[O-]	467.15	479.05	1.62	1.63612
125	O=[N+]([O-])c1c(C2CC2)no[n+]1[O-]	484.15	454.155	1.62	1.66084
126	N#Cc1nonc1/N=N\c1nonc1C#N	507.15	484.093	1.62	1.64659
127	C[C@@H]1CNC(=C([N+](=O)[O-])[N+](=O)[O-])N1	510.98	490.527	1.62	1.4969
128	Cc1nc(N=[N+]=[N-])[nH]c(=O)c1[N+](=O)[O-]	501.75	478.994	1.624	1.74798
129	C(CC(CCc1nnn[nH]1)(c1nnn[nH]1)c1nnn[nH]1)c1nnn[nH]1	494.17	501.347	1.625	1.75194
130	Cn1nnnc1[N+](=O)[O-]	428.15	461.341	1.628	1.72338
131	CN(Cn1nnnc1N)[N+](=O)[O-]	457.15	477.497	1.628	1.76236
132	Cc1nonc1N(CN(c1nonc1C)[N+](=O)[O-])[N+](=O)[O-]	422.85	445.865	1.63	1.70338
133	NC(=O)OCCCC([N+](=O)[O-])([N+](=O)[O-])[N+](=O)[O-]	429.15	448.074	1.63	1.57108
134	NC(=N[N+](=O)[O-])NNc1ccc([N+](=O)[O-])cc1[N+](=O)[O-]	448.15	486.584	1.63	1.78487
135	Cc1c([N+](=O)[O-])cc(-n2cnnn2)cc1[N+](=O)[O-]	451.15	484.476	1.63	1.63654
136	O=C(CCC([N+](=O)[O-])([N+](=O)[O-])[N+](=O)[O-])NC(=O)OCC([N+](=O)[O-])([N+](=O)[O-])[N+](=O)[O-]	456.15	446.372	1.63	1.74783
137	[N-]=[N+]=Nc1nnnn1N=C1CCC(=Nn2nnnc2N=[N+]=[N-])CC1	458.15	481.542	1.63	1.79971
138	[N-]=[N+]=Nc1nncn1/N=N/n1cnnc1	462.85	484.2	1.63	1.76019
139	CCOC(=O)Cn1c([N+](=O)[O-])nc([N+](=O)[O-])c1[N+](=O)[O-]	471.15	464.641	1.63	1.66768
140	[N-]=[N+]=Nc1nc(N=[N+]=[N-])nc(Nc2ccc([N+](=O)[O-])cc2)n1	489.35	476.407	1.63	1.62985
141	COC(=O)Cn1cnc([N+](=O)[O-])c1[N+](=O)[O-]	497.15	468.412	1.63	1.64089
142	Cn1nc([N+](=O)[O-])c([N+]#N)c1[O-]	501.15	479.272	1.63	1.78234
143	CNc1n[n+]([O-])c([N+](=O)[O-])c(NC)c1[N+](=O)[O-]	523.15	497.494	1.63	1.64729
144	[N-]=[N+]=NCCc1c([N+](=O)[O-])cc([N+](=O)[O-])cc1[N+](=O)[O-]	488.15	456.839	1.635	1.62979
145	CC(C)=Nn1nnnc1-n1cc(S(F)(F)(F)(F)F)nn1	435.15	471.823	1.64	1.82592
146	O=[N+]([O-])c1cnn(-c2ccc(-n3cnnn3)cc2[N+](=O)[O-])c1	440.15	482.728	1.64	1.7073
147	COc1cc(-n2cnnn2)c([N+](=O)[O-])cc1[N+](=O)[O-]	450.15	487.518	1.64	1.68087
148	[N-]=[N+]=Nc1nonc1NCNc1nonc1N=[N+]=[N-]	451.15	470.356	1.64	1.77141
149	O=[N+]([O-])OC[C@H]1[C@H](CO[N+](=O)[O-])[C@H](CO[N+](=O)[O-])[C@H]1CO[N+](=O)[O-]	471.65	447.298	1.64	1.54421
150	CN(c1nc(N(C)[N+](=O)[O-])nc(N(C)[N+](=O)[O-])n1)[N+](=O)[O-]	483.15	466.038	1.64	1.65079
151	[N-]=[N+]=Nc1nc(N=[N+]=[N-])nc(Nc2ccccc2[N+](=O)[O-])n1	488.45	478.495	1.64	1.63387
152	O=[N+]([O-])OCc1cc(-c2ncon2)no1	457.65	469.314	1.641	1.59201
153	[N-]=[N+]=NCc1nc(-c2noc(CN=[N+]=[N-])n2)no1	482.15	471.528	1.649	1.64135
154	Cc1nc(-c2nonc2N[N+](=O)[O-])no1	432.15	466.172	1.65	1.71887
155	O=C(C[C@@H](C(=O)O)N(CC([N+](=O)[O-])([N+](=O)[O-])[N+](=O)[O-])[N+](=O)[O-])OCC([N+](=O)[O-])([N+](=O)[O-])[N+](=O)[O-]	432.15	444.414	1.65	1.84516
156	O=C1OCC([N+](=O)[O-])([N+](=O)[O-])COC(=O)C1[N+](=O)[O-]	442.15	454.983	1.65	1.64613
157	COc1c(-n2cnnn2)cc([N+](=O)[O-])cc1[N+](=O)[O-]	444.15	484.267	1.65	1.6728
158	N=C(NN=Cc1c([N+](=O)[O-])cc([N+](=O)[O-])cc1[N+](=O)[O-])NN=Cc1c([N+](=O)[O-])cc([N+](=O)[O-])cc1[N+](=O)[O-]	453.15	480.441	1.65	1.78079
159	N#Cc1c(-c2noc(N)n2)no[n+]1[O-]	468.15	499.479	1.65	1.84584
160	Fc1ccc(-n2ccnn2)c(C(F)(F)F)c1	468.15	469.586	1.65	1.45548
161	Nc1nonc1Nc1ccc([N+](=O)[O-])cc1[N+](=O)[O-]	473.15	491.289	1.65	1.67108
162	[N-]=[N+]=Nc1nc(N=[N+]=[N-])nc(NNc2nc(N=[N+]=[N-])nc(N=[N+]=[N-])n2)n1	475.15	472.269	1.65	1.78104
163	CN(Cn1nc([N+](=O)[O-])cc1[N+](=O)[O-])[N+](=O)[O-]	483.15	466.543	1.65	1.71886
164	CN(Cn1nc([N+](=O)[O-])nc1N)[N+](=O)[O-]	497.15	471.866	1.65	1.82129
165	Cc1[nH][nH]c(=O)c1[N+](=O)[O-]	508.15	504.953	1.65	1.46332
166	O=[N+]([O-])C(=C1NCCCN1)[N+](=O)[O-]	513.18	482.584	1.65	1.51718
167	c1nnc(Nc2nnn[nH]2)nn1	530.15	533.237	1.65	1.84387
168	O=[N+]([O-])OCC1(CO[N+](=O)[O-])CC(CO[N+](=O)[O-])(CO[N+](=O)[O-])C1	469.35	469.161	1.651	1.5909
169	[N-]=[N+]=NCc1nc(-c2nonc2N)no1	456.05	465.612	1.656	1.70384
170	O=C(N[N+](=O)[O-])OCCCC([N+](=O)[O-])([N+](=O)[O-])[N+](=O)[O-]	418.15	450.509	1.66	1.63694
171	O=[N+]([O-])OCc1nnn(CC(Cn2nnc(CO[N+](=O)[O-])c2CO[N+](=O)[O-])O[N+](=O)[O-])c1CO[N+](=O)[O-]	427.15	456.315	1.66	1.77172
172	O=C(O)C[C@@H](C(=O)O)N(CC([N+](=O)[O-])([N+](=O)[O-])[N+](=O)[O-])[N+](=O)[O-]	433.15	444.693	1.66	1.82317
173	CC(=O)O[C@@H]1NC(=C([N+](=O)[O-])[N+](=O)[O-])N[C@H]1OC(C)=O	438.51	457.987	1.66	1.60616
174	[N-]=[N+]=Nc1nncn1/N=N/n1cnnc1N=[N+]=[N-]	458.85	476.988	1.66	1.77889
175	Cc1c([N+](=O)[O-])no[n+]1[O-]	461.15	464.107	1.66	1.58282
176	CN(c1nc(N(C)[N+](=O)[O-])c([N+](=O)[O-])cc1[N+](=O)[O-])[N+](=O)[O-]	463.15	467.565	1.66	1.71374
177	[N-]=[N+]=Nc1c([N+](=O)[O-])cc(-n2cnnn2)cc1[N+](=O)[O-]	464.15	471.882	1.66	1.8038
178	O=[N+]([O-])OC[C@H]1[C@@H](CO[N+](=O)[O-])[C@@H](CO[N+](=O)[O-])[C@H]1CO[N+](=O)[O-]	467.45	447.298	1.66	1.54421
179	O=[N+]([O-])C12C3C4C1C1C2C3C41[N+](=O)[O-]	473.15	481.69	1.66	1.65906
180	CN(Cn1nc([N+](=O)[O-])n(CN(C)[N+](=O)[O-])c1=O)[N+](=O)[O-]	484.15	452.469	1.66	1.69701
181	[N-]=[N+]=Nc1nc(N=[N+]=[N-])nc(Nc2cccc([N+](=O)[O-])c2)n1	486.75	476.057	1.66	1.63535
182	CN(Cn1nc([N+](=O)[O-])nc1-c1nc([N+](=O)[O-])nn1CN(C)[N+](=O)[O-])[N+](=O)[O-]	501.15	460.027	1.66	1.84351
183	[N-]=[N+]=Nc1nnnn1CCn1nnnc1N=[N+]=[N-]	442.15	477.571	1.663	1.81045
184	O=[N+]([O-])OCC12COP(=O)(OC1)OC2	488.15	445.128	1.663	1.61275
185	C[C@]12NC(=O)N([N+](=O)[O-])[C@@]1(C)NC(=O)N2[N+](=O)[O-]	497.15	470.96	1.666	1.84787
186	[N-]=[N+]=NCC(CO[N+](=O)[O-])(CO[N+](=O)[O-])CO[N+](=O)[O-]	453.15	455.089	1.667	1.59605
187	Cn1nnc([N+](=O)[O-])n1	423.15	459.201	1.668	1.69019
188	Cn1nnnc1NCC([N+](=O)[O-])([N+](=O)[O-])[N+](=O)[O-]	417.15	461.07	1.67	1.8506
189	O=C(N[N+](=O)[O-])OC[Si](COC(=O)N[N+](=O)[O-])(COC(=O)N[N+](=O)[O-])COC(=O)N[N+](=O)[O-]	443.15	442.032	1.67	1.65319
190	NC(=O)OC12CC3(OC(N)=O)CC(OC(N)=O)(C1)CC(OC(N)=O)(C2)C3	453.15	466.524	1.67	1.6165
191	O=C(OCC([N+](=O)[O-])([N+](=O)[O-])[N+](=O)[O-])c1cc(C(=O)OCC([N+](=O)[O-])([N+](=O)[O-])[N+](=O)[O-])cc(C(=O)OCC([N+](=O)[O-])([N+](=O)[O-])[N+](=O)[O-])c1	459.15	447.751	1.67	1.80593
192	O=C(NN=Cc1c([N+](=O)[O-])cc([N+](=O)[O-])cc1[N+](=O)[O-])NN=Cc1c([N+](=O)[O-])cc([N+](=O)[O-])cc1[N+](=O)[O-]	476.15	493.909	1.67	1.75427
193	O=[N+]([O-])c1cc(-n2ccnn2)cc(C(F)(F)F)c1	486.15	461.575	1.67	1.54773
194	O=[N+]([O-])c1cc([N+](=O)[O-])c(-n2ccnc2)c([N+](=O)[O-])c1	489.15	471.265	1.67	1.66318
195	c1nnc(Nc2nonc2/N=N\c2nonc2Nc2nncnn2)nn1	492.15	522.487	1.67	1.82861
196	CN(Cn1cc([N+](=O)[O-])c([N+](=O)[O-])n1)[N+](=O)[O-]	507.15	466.305	1.67	1.70337
197	O=[N+]([O-])c1cc([N+](=O)[O-])c(Nc2n[nH]cc2[N+](=O)[O-])c([N+](=O)[O-])c1	526.15	484.177	1.67	1.76989
198	O=[N+]([O-])c1cnn([N+](=O)[O-])c1	472.15	454.806	1.679	1.77724
199	O=C(N[N+](=O)[O-])OCC#CCOC(=O)N[N+](=O)[O-]	422.15	450.897	1.68	1.53667
200	[N-]=[N+]=Nc1nc(CO)n[nH]1	436.57	466.58	1.68	1.67733
201	O=[N+]([O-])OCCn1nnc(N=[N+]([O-])c2nnn(CCO[N+](=O)[O-])n2)n1	448.15	463.676	1.68	1.83857
202	Cc1no[n+]([O-])c1[N+](=O)[O-]	449.15	469.415	1.68	1.58399
203	Nn1cnnc1-n1ncc2c([N+](=O)[O-])cc([N+](=O)[O-])cc21	452.15	486.876	1.68	1.86444
204	O=[N+]([O-])OCC(COc1ccc([N+](=O)[O-])cc1[N+](=O)[O-])(CO[N+](=O)[O-])CO[N+](=O)[O-]	457.65	447.495	1.68	1.63221
205	NC(=N/N=C/c1c([N+](=O)[O-])cc([N+](=O)[O-])cc1[N+](=O)[O-])n1ncc2c([N+](=O)[O-])cc([N+](=O)[O-])cc21	462.15	477.067	1.68	1.79897
206	[N-]=[N+]=Nc1nnc(/N=N/c2nnc(N=[N+]=[N-])[nH]2)[nH]1	466.15	482.619	1.68	1.8211
207	[N-]=[N+]=Nc1nnc(N)nn1	473.15	485.562	1.68	1.75444
208	O=[N+]([O-])N1CN2CN(C1)CN([N+](=O)[O-])C2	478.15	476.385	1.68	1.79515
209	[N-]=[N+]=NCc1nonc1/N=N\c1nonc1CN=[N+]=[N-]	482.15	472.454	1.68	1.64596
210	CN(c1c([N+](=O)[O-])cncc1[N+](=O)[O-])[N+](=O)[O-]	483.15	466.254	1.68	1.65893
211	c1nnc2nncn2n1	516.15	505.228	1.68	1.83313
212	Nc1nnc(-c2nonc2N)o1	519.15	497.21	1.68	1.73159
213	Nc1noc(-c2nonc2N)n1	522.15	498.226	1.68	1.70561
214	O=[N+]([O-])c1ccc(NCCN2c3nonc3-c3no[n+]([O-])c3-c3nonc32)c([N+](=O)[O-])c1	531.18	488.774	1.68	1.85946
215	c1nc(-c2nonc2/N=N\c2nonc2-c2ncon2)no1	532.15	492.599	1.68	1.77838
216	Nc1nnnn1-c1c([N+](=O)[O-])cc(-n2ccnn2)cc1C(F)(F)F	534.15	494.152	1.68	1.79331
217	CC(=O)O[C@H]1NC(=C([N+](=O)[O-])[N+](=O)[O-])N[C@@H]1OC(C)=O	457.15	457.987	1.682	1.60616
218	O=[N+]([O-])OCC1(CO[N+](=O)[O-])CCC1(CO[N+](=O)[O-])CO[N+](=O)[O-]	465.95	456.728	1.683	1.57987
219	CN(Cn1c([N+](=O)[O-])n[nH]c1=O)[N+](=O)[O-]	424.15	455.65	1.69	1.84793
220	NC(=O)OCC(COC(N)=O)([N+](=O)[O-])[N+](=O)[O-]	455.15	452.047	1.69	1.62802
221	O=[N+]([O-])c1cc([N+](=O)[O-])c2[nH+]nn([O-])c2c1	455.15	490.161	1.69	1.81248
222	O=[N+]([O-])c1ccc(-n2ccnn2)c(C(F)(F)F)c1	501.15	456.617	1.69	1.54425
223	O=[N+]([O-])C(=C1NCCN1)[N+](=O)[O-]	530.15	495.071	1.69	1.62327
224	c1nnc(Nc2nnc(Nc3nncnn3)nn2)nn1	552.15	528.721	1.69	1.80042
225	O=[N+]([O-])c1n[nH]c(CO)n1	460.54	443.692	1.695	1.7584
226	CN(Cn1nnc2cc([N+](=O)[O-])cc([N+](=O)[O-])c21)[N+](=O)[O-]	452.15	459.849	1.7	1.78018
227	CN(Cn1cc([N+](=O)[O-])nc1[N+](=O)[O-])[N+](=O)[O-]	456.15	467.351	1.7	1.69948
228	Nn1cnnc1NN=Cc1c([N+](=O)[O-])cc([N+](=O)[O-])cc1[N+](=O)[O-]	458.15	481.222	1.7	1.80373
229	[N-]=[N+]=Nc1nnnn1N=C/C=N/n1nnnc1N=[N+]=[N-]	458.15	473.414	1.7	1.80866
230	CN(c1ncc([N+](=O)[O-])cc1[N+](=O)[O-])[N+](=O)[O-]	463.15	468.454	1.7	1.6722
231	O=[N+]([O-])c1cc(-c2no[n+]([O-])c2[N+](=O)[O-])ccc1-c1no[n+]([O-])c1[N+](=O)[O-]	472.15	476.157	1.7	1.85672
232	[N-]=[N+]=Nc1nc(-c2n[nH]c(N=[N+]=[N-])n2)n[nH]1	474.15	481.752	1.7	1.8601
233	O=[N+]([O-])OCCn1nnnc1/N=N/c1nnnn1CCO[N+](=O)[O-]	452.15	468.024	1.702	1.84136
234	COc1c([N+](=O)[O-])cc([N+](=O)[O-])c(N)c1[N+](=O)[O-]	527.15	484.517	1.709	1.63797
235	O=[N+]([O-])OCc1nnn(CCn2nnc(CO[N+](=O)[O-])c2CO[N+](=O)[O-])c1CO[N+](=O)[O-]	414.15	457.368	1.71	1.7287
236	COn1nnnc1NCC([N+](=O)[O-])([N+](=O)[O-])[N+](=O)[O-]	421.15	460.122	1.71	1.82984
237	CN(CC(=O)NC(=O)OCC([N+](=O)[O-])([N+](=O)[O-])[N+](=O)[O-])[N+](=O)[O-]	423.15	440.107	1.71	1.6856
238	O=C(N[N+](=O)[O-])O[C@@H]1[C@@H](OC(=O)N[N+](=O)[O-])[C@H]([N+](=O)[O-])[C@@H](OC(=O)N[N+](=O)[O-])[C@H](OC(=O)N[N+](=O)[O-])[C@H]1[N+](=O)[O-]	433.15	456.74	1.71	1.86141
239	[N-]=[N+]=Nc1nc(N=[N+]=[N-])n(/N=N/n2nc(N=[N+]=[N-])nc2N=[N+]=[N-])n1	441.95	470.855	1.71	1.80963
240	[N-]=[N+]=NCN(CN(CN(CN=[N+]=[N-])[N+](=O)[O-])[N+](=O)[O-])[N+](=O)[O-]	465.15	458.263	1.71	1.63951
241	O=[N+]([O-])O[C@@H]1[C@@H]2C[C@@H]3C[C@H]1N([N+](=O)[O-])[C@H](C2)[C@H]3O[N+](=O)[O-]	466.85	461.051	1.71	1.56552
242	[N-]=[N+]=NCn1nc([N+](=O)[O-])c2c1c([N+](=O)[O-])nn2CN=[N+]=[N-]	469.15	463.793	1.71	1.88649
243	Cc1nc(-c2nonc2NCC([N+](=O)[O-])([N+](=O)[O-])[N+](=O)[O-])no1	473.15	456.23	1.71	1.81295
244	NC(N)=C(c1ncn[nH]1)[N+](=O)[O-]	540.15	495.819	1.71	1.8675
245	O=[N+]([O-])Nc1nnc(CCc2nnc(N[N+](=O)[O-])o2)o1	475.35	457.963	1.714	1.8179
246	O=[N+]([O-])c1ccc(-[n+]2noc([O-])n2)cc1	509.15	467.713	1.714	1.61234
247	O=[N+]([O-])OCc1cc(-c2no[n+]([O-])c2-c2cc(CO[N+](=O)[O-])on2)no1	466.95	459.426	1.715	1.7589
248	O=C(OOC(=O)c1cc([N+](=O)[O-])cc([N+](=O)[O-])c1)c1cc([N+](=O)[O-])cc([N+](=O)[O-])c1	437.15	471.056	1.718	1.66892
249	O=C(O)CCN(CC([N+](=O)[O-])([N+](=O)[O-])[N+](=O)[O-])[N+](=O)[O-]	419.15	446.202	1.72	1.72171
250	O=C(N[N+](=O)[O-])OCC(COC(=O)N[N+](=O)[O-])(COC(=O)N[N+](=O)[O-])[N+](=O)[O-]	421.15	439.635	1.72	1.71037
251	O=C(N[N+](=O)[O-])OCC([N+](=O)[O-])([N+](=O)[O-])[N+](=O)[O-]	426.15	460.236	1.72	1.74117
252	[N-]=[N+]=Nc1nnn[nH]1	438.15	477.665	1.72	1.7578
253	O=[N+]([O-])c1cc([N+](=O)[O-])n(Cn2nc([N+](=O)[O-])cc2[N+](=O)[O-])n1	464.15	465.899	1.72	1.91834
254	O=[N+]([O-])C(=C1N[C@H]2OCCO[C@@H]2N1)[N+](=O)[O-]	464.88	445.187	1.72	1.68499
255	O=C(NCNC(=O)NCC([N+](=O)[O-])([N+](=O)[O-])[N+](=O)[O-])NCC([N+](=O)[O-])([N+](=O)[O-])[N+](=O)[O-]	472.15	459.386	1.72	1.79899
256	[N-]=[N+]=Nc1nc(N=[N+]=[N-])nc(/N=N/c2nc(N=[N+]=[N-])nc(N=[N+]=[N-])n2)n1	473.15	477.421	1.72	1.72304
257	Nn1cnc([N+](=O)[O-])c1[N+](=O)[O-]	508.15	474.394	1.72	1.88154
258	O=[N+]([O-])OC[C@H](O[N+](=O)[O-])[C@@H](CO[N+](=O)[O-])O[N+](=O)[O-]	466.15	468.652	1.722	1.67993
259	[N-]=[N+]=NCC(CN(CCN(CC(CN=[N+]=[N-])([N+](=O)[O-])[N+](=O)[O-])[N+](=O)[O-])[N+](=O)[O-])([N+](=O)[O-])[N+](=O)[O-]	476.65	455.052	1.722	1.68787
260	O=[N+]([O-])OC[C@]1([N+](=O)[O-])COCN([N+](=O)[O-])C1	476.65	460.34	1.722	1.57251
261	Nc1nonc1-c1nnc(C[N+](=O)[O-])o1	457.85	479.081	1.728	1.74672
262	N#Cc1nn(C([N+](=O)[O-])([N+](=O)[O-])[N+](=O)[O-])nc1C#N	415.15	454.263	1.729	1.85401
263	O=[N+]([O-])c1cc(-c2nnn[nH]2)[nH]n1	459.15	493.598	1.729	1.78846
264	O=C(O)CN([N+](=O)[O-])C(CO[N+](=O)[O-])(CO[N+](=O)[O-])CO[N+](=O)[O-]	409.15	441.139	1.73	1.71463
265	Cc1nonc1N(CC([N+](=O)[O-])([N+](=O)[O-])[N+](=O)[O-])[N+](=O)[O-]	411.15	453.144	1.73	1.78849
266	CC(COC(=O)N[N+](=O)[O-])([N+](=O)[O-])[N+](=O)[O-]	413.15	454.825	1.73	1.58106
267	[N-]=[N+]=Nc1nc(CO[N+](=O)[O-])n[nH]1	418.96	463.244	1.73	1.68946
268	C[C@H](OC(N)=O)C([N+](=O)[O-])([N+](=O)[O-])[N+](=O)[O-]	425.15	466.526	1.73	1.62184
269	O=[N+]([O-])OCCn1nnc(CO[N+](=O)[O-])c1CO[N+](=O)[O-]	428.15	455.461	1.73	1.67235
270	O=[N+]([O-])OCc1n[nH]c(CO[N+](=O)[O-])n1	430.11	456.553	1.73	1.68906
271	O=C(CCN(CC([N+](=O)[O-])([N+](=O)[O-])[N+](=O)[O-])[N+](=O)[O-])OCC([N+](=O)[O-])([N+](=O)[O-])[N+](=O)[O-]	437.15	449.684	1.73	1.73854
272	O=C(OCCC([N+](=O)[O-])([N+](=O)[O-])[N+](=O)[O-])C(=O)OCC([N+](=O)[O-])([N+](=O)[O-])[N+](=O)[O-]	441.15	449.626	1.73	1.72381
273	CN(Cn1cnc([N+](=O)[O-])c1[N+](=O)[O-])[N+](=O)[O-]	463.15	467.98	1.73	1.71684
274	O=[N+]([O-])c1cc([N+](=O)[O-])c(C=NNc2c([N+](=O)[O-])cc([N+](=O)[O-])cc2[N+](=O)[O-])c([N+](=O)[O-])c1	481.15	478.885	1.73	1.74358
275	O=[N+]([O-])c1c[nH]nn1	491.15	475.942	1.73	1.69785
276	c1nnc(N(c2nncnn2)c2nncnn2)nn1	504.15	514.274	1.73	1.78973
277	O=C(NN=Cc1c([N+](=O)[O-])cc([N+](=O)[O-])cc1[N+](=O)[O-])n1ncc2c([N+](=O)[O-])cc([N+](=O)[O-])cc21	517.15	478.163	1.73	1.7967
278	Cc1c(C=NNc2c([N+](=O)[O-])cc([N+](=O)[O-])cc2[N+](=O)[O-])no[n+]1[O-]	492.47	494.27	1.731	1.68918
279	C[C@@]12NC(=O)N[C@@]1(C)N([N+](=O)[O-])C(=O)N2	499.15	487.805	1.732	1.7302
280	O=[N+]([O-])Cc1nnc(-c2nnc(C[N+](=O)[O-])o2)o1	453.85	459.635	1.734	1.7366
281	[N-]=[N+]=Nc1noc(N=C(N)Nc2nnc(N/C(N)=N/c3nc(N=[N+]=[N-])no3)nn2)n1	483.15	479.461	1.734	1.86607
282	CN(Cn1nnc([N+](=O)[O-])n1)[N+](=O)[O-]	453.15	460.279	1.735	1.73319
283	[NH2+]=C([N-][N+](=O)[O-])N(CN(CN(C(=[NH2+])[N-][N+](=O)[O-])[N+](=O)[O-])[N+](=O)[O-])[N+](=O)[O-]	470.15	478.746	1.735	1.80871
284	Nc1c([N+](=O)[O-])nn(COCn2nc([N+](=O)[O-])c(N)c2[N+](=O)[O-])c1[N+](=O)[O-]	476.15	466.942	1.737	1.90766
285	O=C(O)CN(C(=O)C(=O)N(CC(=O)O)[N+](=O)[O-])[N+](=O)[O-]	405.15	436.588	1.74	1.85033
286	Cn1nc([N+](=O)[O-])c(N=[N+]=[N-])c1[N+](=O)[O-]	434.15	464.737	1.74	1.70466
287	CN(Cn1nc([N+](=O)[O-])nc1[N+](=O)[O-])[N+](=O)[O-]	438.15	462.593	1.74	1.76422
288	COc1nc(OCC([N+](=O)[O-])([N+](=O)[O-])[N+](=O)[O-])nc(OCC([N+](=O)[O-])([N+](=O)[O-])[N+](=O)[O-])n1	446.85	448.621	1.74	1.79126
289	[N-]=[N+]=Nc1nc([N+](=O)[O-])n[nH]1	447.15	469.616	1.74	1.76714
290	CN(c1c([N+](=O)[O-])n[nH]c1[N+](=O)[O-])[N+](=O)[O-]	451.15	465.098	1.74	1.79936
291	Cc1c(-c2nc(N[N+](=O)[O-])n[nH]2)no[n+]1[O-]	453.65	475.794	1.74	1.93074
292	CN(CNC(=O)OCC([N+](=O)[O-])([N+](=O)[O-])[N+](=O)[O-])[N+](=O)[O-]	456.15	453.518	1.74	1.6499
293	O=[N+]([O-])N1COCC([N+](=O)[O-])([N+](=O)[O-])C1	465.15	463.156	1.74	1.6374
294	O=[N+]([O-])c1c[nH]nc1-c1nc(-c2nonc2[N+](=O)[O-])no1	489.15	485.5	1.74	1.91017
295	Nc1nnc([N+](=O)[O-])c(N)n1	498.15	500.924	1.742	1.88292
296	O=[N+]([O-])C(=C1NCN(CN2CNC(=C([N+](=O)[O-])[N+](=O)[O-])NC2)CN1)[N+](=O)[O-]	461.15	495.754	1.743	1.80487
297	Nc1c2nc[nH]c2nn[n+]1[O-]	500.15	512.528	1.743	1.90473
298	O=[N+]([O-])Nc1nc(Cc2noc(N[N+](=O)[O-])n2)no1	425.15	452.815	1.744	1.82895
299	[N-]=[N+]=Nc1c([N+](=O)[O-])cc([N+](=O)[O-])c(N=[N+]=[N-])c1[N+](=O)[O-]	485.25	462.16	1.746	1.75625
300	N#CCn1nnc([N+](=O)[O-])n1	483.15	453.448	1.747	1.71019
301	Nc1nonc1N=[N+]([O-])c1nonc1N	521.15	484.527	1.747	1.90654
302	O=[N+]([O-])OCc1nc([N+](=O)[O-])n[nH]1	436.33	458.543	1.749	1.76913
303	O=[N+]([O-])c1cc(-c2c([N+](=O)[O-])no[n+]2[O-])cc([N+](=O)[O-])c1	426.15	465.58	1.75	1.77375
304	O=[N+]([O-])C(F)(CNc1nc[nH]n1)[N+](=O)[O-]	434.15	476.571	1.75	1.84108
305	O=[N+]([O-])N(CCN(c1nonc1-c1ncon1)[N+](=O)[O-])c1nonc1-c1ncon1	448.15	469.805	1.75	1.89187
306	O=C(CCN(C(=O)C(=O)N(CCC(=O)OCC([N+](=O)[O-])([N+](=O)[O-])[N+](=O)[O-])[N+](=O)[O-])[N+](=O)[O-])OCC([N+](=O)[O-])([N+](=O)[O-])[N+](=O)[O-]	453.15	427.647	1.75	1.78959
307	[N-]=[N+]=NC1([N+](=O)[O-])CN([N+](=O)[O-])C1	453.85	464.052	1.75	1.68596
308	[N-]=[N+]=NCc1nc(-c2nonc2-c2noc(CN=[N+]=[N-])n2)no1	466.15	470.694	1.75	1.72608
309	O=[N+]([O-])N=C1NCN([N+](=O)[O-])CN1	480.15	485.31	1.75	1.90008
310	Nc1nc(Cn2nc([N+](=O)[O-])c(N)c2[N+](=O)[O-])no1	483.65	480.806	1.75	1.87725
311	O=NN1CC([N+](=O)[O-])([N+](=O)[O-])C1	486.15	452.279	1.75	1.79425
312	[N-]=[N+]=Nc1nc(N=[N+]=[N-])nc(NNc2ccc([N+](=O)[O-])cc2[N+](=O)[O-])n1	486.45	471.676	1.75	1.72808
313	Nc1c([N+](=O)[O-])cc(-n2cnnn2)cc1[N+](=O)[O-]	496.15	489.448	1.75	1.761
314	N/C(=N\[N+](=O)[O-])N1CC([N+](=O)[O-])([N+](=O)[O-])C1	498.15	462.962	1.75	1.82494
315	[O-][N+](=Nc1nonc1Nc1nncnn1)c1nonc1Nc1nncnn1	505.15	521.137	1.75	1.90752
316	Nc1c([N+](=O)[O-])c(N)c2c([nH+]nn2[O-])c1[N+](=O)[O-]	530.15	503.078	1.75	1.93471
317	CNC(N)=C([N+](=O)[O-])[N+](=O)[O-]	521.15	480.572	1.751	1.59903
318	[N-]=[N+]=NCc1nc(-c2nonc2[N+](=O)[O-])no1	430.85	458.351	1.752	1.75333
319	[N-]=[N+]=Nc1nnc([N+](=O)[O-])c(N)n1	435.15	469.76	1.752	1.83953
320	O=[N+]([O-])NCC(CN[N+](=O)[O-])N[N+](=O)[O-]	456.15	477.305	1.753	1.61083
321	COC(=O)[C@]12NC(=O)N([N+](=O)[O-])[C@]1(C(=O)OC)NC(=O)N2[N+](=O)[O-]	477.15	458.04	1.754	1.80917
322	O=[N+]([O-])OCc1nonc1/N=N\c1nonc1CO[N+](=O)[O-]	457.15	454.759	1.755	1.7692
323	[N-]=[N+]=Nc1nc(N=[N+]=[N-])nc(NNc2nnc(NNc3nc(N=[N+]=[N-])nc(N=[N+]=[N-])n3)nn2)n1	467.05	473.268	1.755	1.83762
324	Nc1n[nH]c(-c2nnc(C[N+](=O)[O-])o2)n1	522.75	482.937	1.756	1.84982
325	O=[N+]([O-])c1cc([N+](=O)[O-])c2no[n+]([O-])c2c1	447.15	469.364	1.759	1.80464
326	O=[N+]([O-])c1cnn(Cn2ncc([N+](=O)[O-])c2[N+](=O)[O-])c1[N+](=O)[O-]	429.15	462.867	1.76	1.90841
327	O=[N+]([O-])N1CN=C(C(F)([N+](=O)[O-])[N+](=O)[O-])NC1	430.65	461.558	1.76	1.90369
328	O=C(N[N+](=O)[O-])OCC(COC(=O)N[N+](=O)[O-])([N+](=O)[O-])[N+](=O)[O-]	431.15	447.2	1.76	1.72207
329	[N-]=[N+]=Nc1c([N+](=O)[O-])nn(Cn2nc([N+](=O)[O-])c(N=[N+]=[N-])c2[N+](=O)[O-])c1[N+](=O)[O-]	432.15	460.019	1.76	1.91103
330	[N-]=[N+]=Nc1nonc1-c1nnc(-c2nonc2N=[N+]=[N-])o1	442.15	475.224	1.76	1.80046
331	O=[N+]([O-])c1ccn([N+](=O)[O-])n1	444.15	459.324	1.76	1.75047
332	[N-]=[N+]=Nc1cc(N=[N+]=[N-])c2n[n+]3[n-]c4c([N+](=O)[O-])cc([N+](=O)[O-])cc4n3c2n1	454.15	469.019	1.76	1.92062
333	Nc1c([N+](=O)[O-])nn(C[N+](=O)[O-])c1[N+](=O)[O-]	459.15	472.311	1.76	1.88144
334	[N-]=[N+]=Nc1n[nH]c(Nc2nnc(Nc3nc(N=[N+]=[N-])n[nH]3)nn2)n1	462.95	487.838	1.76	1.93279
335	O=C(N[N+](=O)[O-])OCC(COC(=O)N[N+](=O)[O-])(COC(=O)N[N+](=O)[O-])COC(=O)N[N+](=O)[O-]	469.15	441.794	1.76	1.67388
336	Nc1noc(=O)[nH]1	480.15	487.898	1.76	1.70896
337	CN(Cn1nc([N+](=O)[O-])c([N+](=O)[O-])c1Cl)[N+](=O)[O-]	487.15	464.237	1.76	1.78659
338	Nc1c([N+](=O)[O-])cc([N+](=O)[O-])c2[nH+]nn([O-])c12	493.15	498.037	1.76	1.87451
339	Nn1nc([N+](=O)[O-])cc1[N+](=O)[O-]	498.15	469.959	1.76	1.90515
340	O=[N+]([O-])c1cc([N+](=O)[O-])c2[nH]n[n+]([O-])c2c1	521.65	490.773	1.76	1.82091
341	Cc1cc(C)n(-c2n[n+]([O-])c(N)[n+]([O-])n2)n1	525.15	503.324	1.76	1.6916
342	Nc1nnc(N=Nc2nnc(N)nn2)nn1	537.15	515.338	1.76	1.80735
343	O=[N+]([O-])OC1CN([N+](=O)[O-])CN([N+](=O)[O-])C1	470.15	469.557	1.762	1.6615
344	Nc1nonc1Nc1c([N+](=O)[O-])cc([N+](=O)[O-])cc1[N+](=O)[O-]	478.15	481.052	1.762	1.80543
345	[N-]=[N+]=Nc1nc(N=Nc2nnc(N=Nc3nc(N=[N+]=[N-])nc(N=[N+]=[N-])n3)nn2)nc(N=[N+]=[N-])n1	461.75	481.073	1.763	1.77139
346	O=[N+]([O-])c1cc([N+](=O)[O-])c(C=NNc2nnn[nH]2)c([N+](=O)[O-])c1	457.35	494.099	1.765	1.81049
347	O=[N+]([O-])Cn1cnc([N+](=O)[O-])c1[N+](=O)[O-]	420.15	464.873	1.77	1.80645
348	[N-]=[N+]=Nc1n[nH]nc1[N+](=O)[O-]	422.15	466.455	1.77	1.79811
349	[N-]=[N+]=Nc1c([N+](=O)[O-])ncn1/N=N\n1cnc([N+](=O)[O-])c1N=[N+]=[N-]	427.15	463.039	1.77	1.86166
350	CN(CN(C(=O)OCC(F)([N+](=O)[O-])[N+](=O)[O-])[N+](=O)[O-])[N+](=O)[O-]	431.15	451.612	1.77	1.6616
351	O=[N+]([O-])c1ccc(-c2c([N+](=O)[O-])no[n+]2[O-])cc1-c1c([N+](=O)[O-])no[n+]1[O-]	446.15	468.088	1.77	1.87166
352	O=[N+]([O-])c1c[nH]nc1-n1cnnn1	448.15	486.855	1.77	1.89084
353	Nc1c([N+](=O)[O-])cnc2no[n+]([O-])c12	489.08	489.927	1.77	1.80383
354	N#Cc1c([N+](=O)[O-])c([N+](=O)[O-])nn1N	490.15	477.206	1.77	1.92164
355	O=[N+]([O-])c1cc([N+](=O)[O-])n(CN(Cn2nc([N+](=O)[O-])cc2[N+](=O)[O-])[N+](=O)[O-])n1	501.15	458.267	1.77	1.90954
356	[N-]=[N+]=Nc1n[nH]c(N)c1[N+](=O)[O-]	430.15	473.021	1.771	1.85657
357	Nc1nonc1-n1nc([N+](=O)[O-])cc1[N+](=O)[O-]	518.15	474.17	1.771	1.9578
358	Nc1c2cn[nH]c2nn[n+]1[O-]	494.15	515.787	1.772	1.90206
359	O=[N+]([O-])c1cn(/N=N/n2cc([N+](=O)[O-])nn2)nn1	450.15	464.761	1.777	1.94599
360	[N-]=[N+]=Nc1nonc1N(CN(c1nonc1N=[N+]=[N-])[N+](=O)[O-])[N+](=O)[O-]	424.65	459.68	1.78	1.87998
361	O=C(N[N+](=O)[O-])OCC(COC(=O)N[N+](=O)[O-])OC(=O)N[N+](=O)[O-]	425.15	445.33	1.78	1.69733
362	CN(Cn1nc([N+](=O)[O-])c(N)c1[N+](=O)[O-])[N+](=O)[O-]	438.15	471.457	1.78	1.78671
363	Cn1nc(N=Nc2nc(C([N+](=O)[O-])([N+](=O)[O-])[N+](=O)[O-])n(C)n2)nc1C([N+](=O)[O-])([N+](=O)[O-])[N+](=O)[O-]	438.15	453.952	1.78	1.94381
364	Cc1nc(-c2nonc2N(CC([N+](=O)[O-])([N+](=O)[O-])[N+](=O)[O-])[N+](=O)[O-])no1	445.15	445.69	1.78	1.88915
365	O=C(N[N+](=O)[O-])O[C@@H]1O[C@@H]2[C@@H](OC(=O)N[N+](=O)[O-])O[C@@H]3[C@@H](OC(=O)N[N+](=O)[O-])O[C@H]1C23[N+](=O)[O-]	445.15	452.395	1.78	1.88888
366	O=[N+]([O-])c1cc([N+](=O)[O-])c(C=NNC(=N/N=C/c2c([N+](=O)[O-])cc([N+](=O)[O-])cc2[N+](=O)[O-])NN=Cc2c([N+](=O)[O-])cc([N+](=O)[O-])cc2[N+](=O)[O-])c([N+](=O)[O-])c1	451.15	483.171	1.78	1.76569
367	O=[N+]([O-])C(COCOCC([N+](=O)[O-])([N+](=O)[O-])[N+](=O)[O-])([N+](=O)[O-])[N+](=O)[O-]	468.15	463.392	1.78	1.69672
368	O=[N+]([O-])OCc1nc(-c2nonc2/N=N\c2nonc2-c2noc(CO[N+](=O)[O-])n2)no1	473.15	466.74	1.78	1.88325
369	O=[N+]([O-])c1cc([N+](=O)[O-])c(Nc2c[nH]nn2)c([N+](=O)[O-])c1	493.15	495.667	1.78	1.76405
370	O=[N+]([O-])c1cc([N+](=O)[O-])c(C=NNc2nnc(NN=Cc3c([N+](=O)[O-])cc([N+](=O)[O-])cc3[N+](=O)[O-])nn2)c([N+](=O)[O-])c1	503.15	485.024	1.78	1.78746
371	O=[N+]([O-])c1cc(C=NO)c(O)c([N+](=O)[O-])c1	468.15	481.936	1.783	1.64407
372	Cc1c(C(=O)OCC([N+](=O)[O-])([N+](=O)[O-])[N+](=O)[O-])no[n+]1[O-]	456.82	453.233	1.784	1.75075
373	O=[N+]([O-])OCc1onc(-c2noc(CO[N+](=O)[O-])c2CO[N+](=O)[O-])c1CO[N+](=O)[O-]	466.85	457.258	1.786	1.70832
374	O=[N+]([O-])N1CC([N+](=O)[O-])([N+](=O)[O-])CN([N+](=O)[O-])CC([N+](=O)[O-])([N+](=O)[O-])C1	484.15	467.197	1.788	1.68941
375	Nc1noc(-c2c(N)no[n+]2[O-])n1	492.15	496.872	1.788	1.81403
376	O=c1[nH][nH]c(=O)n1NCC([N+](=O)[O-])([N+](=O)[O-])[N+](=O)[O-]	425.15	469.743	1.79	1.98431
377	N#[N+]c1cc([N+](=O)[O-])c([O-])c([N+](=O)[O-])c1	441.15	484.438	1.79	1.69571
378	O=C(NCC([N+](=O)[O-])([N+](=O)[O-])[N+](=O)[O-])OCC(COC(=O)NCC([N+](=O)[O-])([N+](=O)[O-])[N+](=O)[O-])([N+](=O)[O-])[N+](=O)[O-]	442.15	443.415	1.79	1.77668
379	O=C(NCN(CC([N+](=O)[O-])([N+](=O)[O-])[N+](=O)[O-])[N+](=O)[O-])OCC([N+](=O)[O-])([N+](=O)[O-])[N+](=O)[O-]	443.15	460.525	1.79	1.78336
380	O=[N+]([O-])OCC(CO[N+](=O)[O-])(CO[N+](=O)[O-])Nc1nnc2nncn2n1	445.55	455.607	1.79	1.84219
381	O=[N+]([O-])c1cc(-n2cnnn2)cc([N+](=O)[O-])c1[N+](=O)[O-]	448.15	477.347	1.79	1.85887
382	O=[N+]([O-])C(CNc1nnnn1CCn1nnnc1NCC([N+](=O)[O-])([N+](=O)[O-])[N+](=O)[O-])([N+](=O)[O-])[N+](=O)[O-]	456.15	458.613	1.79	1.98004
383	Nc1nnc2nonc2c1[N+](=O)[O-]	459.15	491.327	1.79	1.94798
384	O=c1n(CO[N+](=O)[O-])c2nc3nonc3nc2n1CO[N+](=O)[O-]	463.15	447.388	1.79	1.96591
385	[N-]=[N+]=Nc1nonc1-c1nnc(-c2nnc(-c3nonc3N=[N+]=[N-])o2)o1	464.15	478.541	1.79	1.81512
386	O=[N+]([O-])N(Cc1nnn[nH]1)Cc1nnn[nH]1	471.15	477.782	1.79	1.82187
387	NC(=N[N+](=O)[O-])NN=Cc1c([N+](=O)[O-])cc([N+](=O)[O-])cc1[N+](=O)[O-]	477.15	490.009	1.79	1.84164
388	O=[N+]([O-])C(=C1NCOCN1)[N+](=O)[O-]	482.35	477.967	1.79	1.62778
389	[O-][n+]1onc(-c2ncon2)c1-c1ncon1	500.15	478.359	1.79	1.77736
390	Nc1[n+]([O-])nc(-n2cccn2)n[n+]1[O-]	510.15	496.618	1.79	1.95756
391	Nc1nc(-c2n[nH]cc2[N+](=O)[O-])n[nH]1	554.15	516.637	1.79	1.91667
392	O=C(OCC([N+](=O)[O-])([N+](=O)[O-])[N+](=O)[O-])c1cc([N+](=O)[O-])c(C(=O)OCC([N+](=O)[O-])([N+](=O)[O-])[N+](=O)[O-])cc1[N+](=O)[O-]	465.85	451.796	1.792	1.80983
393	NC(N)=Nc1c([N+](=O)[O-])cc([N+](=O)[O-])cc1[N+](=O)[O-]	505.15	487.159	1.794	1.78886
394	[N-]=[N+]=Nc1nonc1-[n+]1nc2nonc2[n-]1	459.54	483.728	1.795	1.87715
395	CN(Cn1nnc(C([N+](=O)[O-])([N+](=O)[O-])[N+](=O)[O-])n1)[N+](=O)[O-]	439.15	462.996	1.796	1.84375
396	O=[N+]([O-])NCC(CN[N+](=O)[O-])O[N+](=O)[O-]	441.15	464.607	1.798	1.60157
397	O=[N+]([O-])c1cnn(C([N+](=O)[O-])([N+](=O)[O-])[N+](=O)[O-])c1	405.15	449.209	1.8	1.85392
398	O=[N+]([O-])OCC(CO[N+](=O)[O-])(CO[N+](=O)[O-])N(CC(CN([N+](=O)[O-])C(CO[N+](=O)[O-])(CO[N+](=O)[O-])CO[N+](=O)[O-])O[N+](=O)[O-])[N+](=O)[O-]	423.15	459.314	1.8	1.7157
399	[N-]=[N+]=Nc1nc(OCC([N+](=O)[O-])([N+](=O)[O-])[N+](=O)[O-])nc(OCC([N+](=O)[O-])([N+](=O)[O-])[N+](=O)[O-])n1	443.05	447.635	1.8	1.85186
400	O=[N+]([O-])C(CNc1nc2nonc2nc1NCC([N+](=O)[O-])([N+](=O)[O-])[N+](=O)[O-])([N+](=O)[O-])[N+](=O)[O-]	463.15	469.184	1.8	1.96768
401	O=C(NCC([N+](=O)[O-])([N+](=O)[O-])[N+](=O)[O-])OCC(F)([N+](=O)[O-])[N+](=O)[O-]	464.15	450.793	1.8	1.74298
402	CN(c1c([N+](=O)[O-])nn(/N=N\n2nc([N+](=O)[O-])c(N(C)[N+](=O)[O-])c2[N+](=O)[O-])c1[N+](=O)[O-])[N+](=O)[O-]	468.15	458.463	1.8	1.91951
403	Nc1c([N+](=O)[O-])c([N+](=O)[O-])nn1Cc1noc(=N[N+](=O)[O-])[nH]1	474.15	466.435	1.8	1.95882
404	Nc1nnc(-c2cccc(-c3nnc(N)n3N)n2)n1N	477.15	495.685	1.8	1.951
405	[N-]=[N+]=NCc1nc(-c2no[n+]([O-])c2-c2noc(CN=[N+]=[N-])n2)no1	483.15	468.452	1.8	1.79559
406	[N-]=[N+]=Nc1ncn(-c2c([N+](=O)[O-])cc([N+](=O)[O-])cc2C(F)(F)F)n1	486.15	464.312	1.8	1.76436
407	O=c1[nH]c(-c2nonc2[N+](=O)[O-])no1	494.83	475.193	1.8	1.94654
408	O=[N+]([O-])c1cc([N+](=O)[O-])c(-n2ncc([N+](=O)[O-])n2)c([N+](=O)[O-])c1	508.15	465.596	1.8	1.86952
409	O=[N+]([O-])c1c[nH]nc1/N=[N+](\[O-])c1[nH]ncc1[N+](=O)[O-]	512.15	476.556	1.8	1.86506
410	O=[N+]([O-])N=c1[nH]c2cc([N+](=O)[O-])c([N+](=O)[O-])cc2[nH]1	523.15	488.784	1.8	1.83296
411	Nc1nc(-c2nonc2/N=[N+](/[O-])c2nonc2-c2noc(N)n2)no1	537.15	510.869	1.8	1.98098
412	Nc1nc(-c2nonc2/N=N\c2nonc2-c2noc(=O)[nH]2)no1	543.15	515.029	1.8	1.96125
413	Nc1nc2nonc2c(N)[n+]1[O-]	553.15	515.873	1.8	1.95622
414	Nc1c([N+](=O)[O-])c2cc(c1[N+](=O)[O-])Oc1cc(c([N+](=O)[O-])cc1[N+](=O)[O-])Oc1cc(c([N+](=O)[O-])c(N)c1[N+](=O)[O-])Oc1cc(c([N+](=O)[O-])cc1[N+](=O)[O-])O2	528.68	490.557	1.801	1.74536
415	O=[N+]([O-])c1nnn(Cc2nnn[nH]2)n1	487.15	481.075	1.802	1.95476
416	Nc1nonc1-c1c(-c2nonc2[N+](=O)[O-])no[n+]1[O-]	528.55	492.844	1.802	1.99906
417	O=[N+]([O-])N1[C@@H]2[C@H]3N([N+](=O)[O-])[C@H]4[C@@H](N(CC([N+](=O)[O-])([N+](=O)[O-])[N+](=O)[O-])[C@H]([C@@H]1N4CC(F)([N+](=O)[O-])[N+](=O)[O-])N2[N+](=O)[O-])N3[N+](=O)[O-]	482.15	451.657	1.806	1.80584
418	O=C(OCC([N+](=O)[O-])([N+](=O)[O-])[N+](=O)[O-])c1cc(C(=O)OCC([N+](=O)[O-])([N+](=O)[O-])[N+](=O)[O-])c([N+](=O)[O-])cc1[N+](=O)[O-]	444.75	453.018	1.807	1.81478
419	O=[N+]([O-])c1nonc1N(CC([N+](=O)[O-])([N+](=O)[O-])[N+](=O)[O-])[N+](=O)[O-]	408.15	452.69	1.81	1.91633
420	N#[N+][c-]1c([N+](=O)[O-])nnc1[N+](=O)[O-]	427.15	465.8	1.81	1.7997
421	O=C(OCC(COC(=O)OCC([N+](=O)[O-])([N+](=O)[O-])[N+](=O)[O-])([N+](=O)[O-])[N+](=O)[O-])OCC([N+](=O)[O-])([N+](=O)[O-])[N+](=O)[O-]	449.15	449.795	1.81	1.75857
422	O=[N+]([O-])n1ccc(-c2ccn([N+](=O)[O-])n2)n1	456.15	477.455	1.81	1.73212
423	O=[N+]([O-])OCCN(c1c([N+](=O)[O-])cc([N+](=O)[O-])cc1[N+](=O)[O-])[N+](=O)[O-]	457.15	454.824	1.81	1.74514
424	O=[N+]([O-])C(COC(OCC([N+](=O)[O-])([N+](=O)[O-])[N+](=O)[O-])(OCC([N+](=O)[O-])([N+](=O)[O-])[N+](=O)[O-])OCC([N+](=O)[O-])([N+](=O)[O-])[N+](=O)[O-])([N+](=O)[O-])[N+](=O)[O-]	464.15	455.462	1.81	1.81821
425	O=C(NCC(F)([N+](=O)[O-])[N+](=O)[O-])OCC([N+](=O)[O-])([N+](=O)[O-])[N+](=O)[O-]	464.15	452.819	1.81	1.74623
426	O=[N+]([O-])C(COC(OCC([N+](=O)[O-])([N+](=O)[O-])[N+](=O)[O-])OCC([N+](=O)[O-])([N+](=O)[O-])[N+](=O)[O-])([N+](=O)[O-])[N+](=O)[O-]	465.15	454.146	1.81	1.78651
427	O=C(CC(=O)OCC(F)([N+](=O)[O-])[N+](=O)[O-])OCC(F)([N+](=O)[O-])[N+](=O)[O-]	465.65	448.491	1.81	1.65897
428	O=[N+]([O-])N=c1[nH]nc(CO[N+](=O)[O-])[nH]1	481.7	466.765	1.81	1.87326
429	O=[N+]([O-])c1cc([N+](=O)[O-])c(NCCO)c([N+](=O)[O-])c1NCCO	511.15	484.559	1.81	1.6158
430	O=[N+]([O-])N=c1[nH]nc(CO)o1	429.55	450.14	1.811	1.73665
431	O=[N+]([O-])c1ncn(CCn2nnc([N+](=O)[O-])n2)n1	449.15	461.463	1.811	1.87357
432	O=[N+]([O-])c1cnn(-c2ncn([N+](=O)[O-])n2)n1	433.95	470.681	1.812	2.00796
433	O=[N+]([O-])c1nn(Cc2n[nH]c(Cn3nc([N+](=O)[O-])c([N+](=O)[O-])c3[N+](=O)[O-])n2)c([N+](=O)[O-])c1[N+](=O)[O-]	491.15	466.452	1.815	2.00287
434	COC(=O)C12N([N+](=O)[O-])C(=O)N([N+](=O)[O-])C1(C(=O)OC)N([N+](=O)[O-])C(=O)N2[N+](=O)[O-]	432.15	459.083	1.816	1.89879
435	O=[N+]([O-])c1cc([N+](=O)[O-])n(-c2nonc2[N+](=O)[O-])n1	498.15	462.724	1.816	1.95973
436	O=[N+]([O-])OCC(CO[N+](=O)[O-])N(C(CO[N+](=O)[O-])CO[N+](=O)[O-])[N+](=O)[O-]	438.15	455.09	1.817	1.66568
437	O=[N+]([O-])N1C(C([N+](=O)[O-])([N+](=O)[O-])[N+](=O)[O-])=N[C@H]2OCCO[C@@H]21	408.07	444.346	1.82	1.84298
438	CN(CN(C(=O)OCC([N+](=O)[O-])([N+](=O)[O-])[N+](=O)[O-])[N+](=O)[O-])[N+](=O)[O-]	420.15	463.92	1.82	1.68464
439	Nc1nc(OCC([N+](=O)[O-])([N+](=O)[O-])[N+](=O)[O-])nc(OCC([N+](=O)[O-])([N+](=O)[O-])[N+](=O)[O-])n1	422.05	451.454	1.82	1.94416
440	O=[N+]([O-])c1cn([N+](=O)[O-])nc1-c1noc(-c2nn([N+](=O)[O-])cc2[N+](=O)[O-])n1	429.15	465.848	1.82	2.01681
441	O=[N+]([O-])OCCN(c1c([N+](=O)[O-])c(N(CCO[N+](=O)[O-])[N+](=O)[O-])c([N+](=O)[O-])c(N(CCO[N+](=O)[O-])[N+](=O)[O-])c1[N+](=O)[O-])[N+](=O)[O-]	431.15	461.576	1.82	1.79518
442	C[C@@H](NC(=O)N[C@H](C)C([N+](=O)[O-])([N+](=O)[O-])[N+](=O)[O-])C([N+](=O)[O-])([N+](=O)[O-])[N+](=O)[O-]	433.15	470.22	1.82	1.71033
443	O=[N+]([O-])OCCN(c1c([N+](=O)[O-])cc([N+](=O)[O-])c(N(CCO[N+](=O)[O-])[N+](=O)[O-])c1[N+](=O)[O-])[N+](=O)[O-]	439.15	456.044	1.82	1.76846
444	O=C(O)CN(CC([N+](=O)[O-])([N+](=O)[O-])[N+](=O)[O-])[N+](=O)[O-]	440.15	454.462	1.82	1.7958
445	O=[N+]([O-])C(COc1nc(OCC([N+](=O)[O-])([N+](=O)[O-])[N+](=O)[O-])nc(OCC([N+](=O)[O-])([N+](=O)[O-])[N+](=O)[O-])n1)([N+](=O)[O-])[N+](=O)[O-]	441.95	447.284	1.82	1.87389
446	NC(=O)OCC([N+](=O)[O-])([N+](=O)[O-])[N+](=O)[O-]	442.15	459.573	1.82	1.69866
447	[N-]=[N+]=NC(=NO)/C(N=[N+]=[N-])=N/O	443.65	470.948	1.82	1.72551
448	O=[N+]([O-])[N-]n1cn[nH+]c1	444.15	474.806	1.82	1.63261
449	O=[N+]([O-])N1CC([N+](=O)[O-])([N+](=O)[O-])CC([N+](=O)[O-])([N+](=O)[O-])C1	454.15	467.119	1.82	1.70171
450	O=[N+]([O-])N1CN([N+](=O)[O-])CC([N+](=O)[O-])([N+](=O)[O-])C1	456.15	469.823	1.82	1.73232
451	O=[N+]([O-])C(=C1N[C@@H](O)[C@H](O)N1)[N+](=O)[O-]	457.96	476.384	1.82	1.90688
452	O=[N+]([O-])c1cc([N+](=O)[O-])c(C=NNC(=N/N=C\c2c([N+](=O)[O-])cc([N+](=O)[O-])cc2[N+](=O)[O-])n2ncc3c([N+](=O)[O-])cc([N+](=O)[O-])cc32)c([N+](=O)[O-])c1	465.15	476.771	1.82	1.79515
453	Nc1nonc1-c1noc(-c2[nH]nc([N+](=O)[O-])c2[N+](=O)[O-])n1	469.15	488.478	1.82	1.97329
454	O=[N+]([O-])c1c(NCCO)c([N+](=O)[O-])c(NCCO)c([N+](=O)[O-])c1NCCO	472.15	478.962	1.82	1.63223
455	O=C(OCC(F)([N+](=O)[O-])[N+](=O)[O-])c1c([N+](=O)[O-])cc([N+](=O)[O-])cc1[N+](=O)[O-]	475.75	458.965	1.82	1.74835
456	O=[N+]([O-])OCn1nc([N+](=O)[O-])c2c1c([N+](=O)[O-])nn2CO[N+](=O)[O-]	479.15	461.042	1.82	1.96729
457	Cc1nn(-c2n[n+]([O-])c(N)[n+]([O-])n2)c(C)c1[N+](=O)[O-]	484.15	499.741	1.82	1.838
458	O=[N+]([O-])c1cn(/N=N\n2cc([N+](=O)[O-])c([N+](=O)[O-])n2)nc1[N+](=O)[O-]	496.15	454.394	1.82	1.93705
459	O=[N+]([O-])C(CNc1nonc1/N=N\c1nonc1NCC([N+](=O)[O-])([N+](=O)[O-])[N+](=O)[O-])([N+](=O)[O-])[N+](=O)[O-]	503.15	460.146	1.82	1.96851
460	O=[N+]([O-])c1cc([N+](=O)[O-])c(O)c([N+](=O)[O-])n1	504.55	470.677	1.82	1.81782
461	Nc1c([N+](=O)[O-])nn(-c2c([N+](=O)[O-])cc([N+](=O)[O-])cc2[N+](=O)[O-])c1[N+](=O)[O-]	511.35	473.017	1.82	1.89126
462	O=[N+]([O-])Cc1nnc(-c2n[nH]c(=N[N+](=O)[O-])[nH]2)o1	423.55	458.991	1.822	1.99554
463	O=[N+]([O-])OCc1noc(-c2nc(CO[N+](=O)[O-])no2)n1	476.35	459.223	1.823	1.7161
464	Nc1c([N+](=O)[O-])cc([N+](=O)[O-])c(O)c1[N+](=O)[O-]	516.85	487.958	1.823	1.77353
465	O=[N+]([O-])OCC(CO[N+](=O)[O-])([N+](=O)[O-])C(CO[N+](=O)[O-])(CO[N+](=O)[O-])[N+](=O)[O-]	447.15	464.406	1.824	1.71289
466	Nc1nonc1Nc1ccc([N+](=O)[O-])c2nonc12	525.15	495.88	1.825	1.77645
467	[N-]=[N+]=NCN1[C@H]2[C@@H]3N([N+](=O)[O-])[C@@H]4[C@@H]1N([N+](=O)[O-])[C@@H]([C@@H](N3[N+](=O)[O-])N2[N+](=O)[O-])N4[N+](=O)[O-]	479.15	458.598	1.827	1.79697
468	O=[N+]([O-])N1COCN=C1C([N+](=O)[O-])([N+](=O)[O-])[N+](=O)[O-]	413.55	452.275	1.83	1.8049
469	O=C(CCC([N+](=O)[O-])([N+](=O)[O-])[N+](=O)[O-])OCC([N+](=O)[O-])([N+](=O)[O-])[N+](=O)[O-]	428.15	461.513	1.83	1.69129
470	O=[N+]([O-])c1cn([N+](=O)[O-])nc1/N=[N+](/[O-])c1nn([N+](=O)[O-])cc1[N+](=O)[O-]	434.15	465.095	1.83	1.99621
471	[N-]=[N+]=Nc1c([N+](=O)[O-])nn(CN(Cn2nc([N+](=O)[O-])c(N=[N+]=[N-])c2[N+](=O)[O-])[N+](=O)[O-])c1[N+](=O)[O-]	439.15	458.77	1.83	1.90314
472	[N-]=[N+]=Nc1c([N+](=O)[O-])c([N+](=O)[O-])nn1CN(Cn1nc([N+](=O)[O-])c([N+](=O)[O-])c1N=[N+]=[N-])[N+](=O)[O-]	442.15	460.187	1.83	1.94799
473	O=[N+]([O-])c1ncn(NCC([N+](=O)[O-])([N+](=O)[O-])[N+](=O)[O-])c1[N+](=O)[O-]	444.15	467.57	1.83	1.88723
474	O=[N+]([O-])c1cn([N+](=O)[O-])nc1-c1nc(-c2noc(-c3nn([N+](=O)[O-])cc3[N+](=O)[O-])n2)no1	445.15	477.553	1.83	2.02205
475	O=C(Cl)CN(CC([N+](=O)[O-])([N+](=O)[O-])[N+](=O)[O-])[N+](=O)[O-]	447.15	472.425	1.83	1.70757
476	O=[N+]([O-])OCn1nc([N+](=O)[O-])nc1-c1nc([N+](=O)[O-])nn1CO[N+](=O)[O-]	449.15	461.211	1.83	1.96929
477	Nc1cc2c(cc1[N+](=O)[O-])n([N+](=O)[O-])c(=O)n2[N+](=O)[O-]	458.49	476.331	1.83	1.91481
478	O=C(OCC(F)([N+](=O)[O-])[N+](=O)[O-])OCC([N+](=O)[O-])([N+](=O)[O-])[N+](=O)[O-]	462.15	457.995	1.83	1.72826
479	O=[N+]([O-])C(c1nonc1Oc1nonc1C([N+](=O)[O-])[N+](=O)[O-])[N+](=O)[O-]	469.15	448.612	1.83	1.94163
480	N#[N+]c1[n-]c(-c2nc([N+](=O)[O-])c([N+]#N)[n-]2)nc1[N+](=O)[O-]	472.15	484.159	1.83	1.86175
481	Nc1c([N+](=O)[O-])nn(Cc2nnn[nH]2)c1[N+](=O)[O-]	481.15	477.179	1.83	1.94388
482	O=[N+]([O-])Nc1nc[nH]n1	481.15	475.122	1.83	1.79824
483	O=[N+]([O-])c1cnn(-c2nc([N+](=O)[O-])n[nH]2)n1	504.15	470.847	1.83	2.00699
484	NC(=N[N+](=O)[O-])Nc1nncnn1	505.15	481.397	1.83	1.96559
485	Nc1nnc(-c2nonc2/N=N\c2nonc2-c2nnc(N)o2)o1	506.15	515.262	1.83	1.93442
486	O=[N+]([O-])c1cn([N+](=O)[O-])nc1-c1nnc(-c2nn([N+](=O)[O-])cc2[N+](=O)[O-])o1	432.15	469.753	1.831	2.01955
487	O=[N+]([O-])OCc1nc(-c2noc(CO[N+](=O)[O-])n2)no1	456.55	467.777	1.832	1.75908
488	O=C(OCC([N+](=O)[O-])([N+](=O)[O-])[N+](=O)[O-])c1c([N+](=O)[O-])cc([N+](=O)[O-])c(C(=O)OCC([N+](=O)[O-])([N+](=O)[O-])[N+](=O)[O-])c1[N+](=O)[O-]	460.45	454.697	1.832	1.85029
489	[N-]=[N+]=NCC(CN(CC(CN=[N+]=[N-])([N+](=O)[O-])[N+](=O)[O-])[N+](=O)[O-])([N+](=O)[O-])[N+](=O)[O-]	469.45	455.01	1.835	1.67964
490	CCOC(=O)C12N([N+](=O)[O-])C(=O)N([N+](=O)[O-])C1(C(=O)OCC)N([N+](=O)[O-])C(=O)N2[N+](=O)[O-]	418.15	453.536	1.837	1.77847
491	O=C(N[N+](=O)[O-])OC[C@H](OC(=O)N[N+](=O)[O-])[C@@H](COC(=O)N[N+](=O)[O-])OC(=O)N[N+](=O)[O-]	448.15	451.284	1.837	1.74921
492	Nc1no[n+]([O-])c1/N=N\c1c(N)no[n+]1[O-]	484.55	485.933	1.837	2.02025
493	O=[N+]([O-])c1cc(-c2nnc(-c3[nH]nc([N+](=O)[O-])c3[N+](=O)[O-])o2)[nH]n1	527.15	487.158	1.838	1.94366
494	O=C(OCC([N+](=O)[O-])([N+](=O)[O-])[N+](=O)[O-])c1c([N+](=O)[O-])cc([N+](=O)[O-])cc1[N+](=O)[O-]	466.35	458.343	1.839	1.7899
495	O=[N+]([O-])C(CNc1nnnn1OCCOn1nnnc1NCC([N+](=O)[O-])([N+](=O)[O-])[N+](=O)[O-])([N+](=O)[O-])[N+](=O)[O-]	420.15	451.791	1.84	1.96209
496	Cc1nc(C([N+](=O)[O-])([N+](=O)[O-])[N+](=O)[O-])no1	421.15	465.374	1.84	1.68988
497	O=C(CCC([N+](=O)[O-])([N+](=O)[O-])[N+](=O)[O-])NCC([N+](=O)[O-])([N+](=O)[O-])[N+](=O)[O-]	428.15	455.944	1.84	1.71946
498	O=C1OCC(CO[N+](=O)[O-])(CO[N+](=O)[O-])N1[N+](=O)[O-]	433.15	459.117	1.84	1.67801
499	O=[N+]([O-])/N=c1\[nH]c(Cn2nc([N+](=O)[O-])c([N+](=O)[O-])c2[N+](=O)[O-])no1	442.75	462.671	1.84	1.94447
500	O=[N+]([O-])c1cn(NCC([N+](=O)[O-])([N+](=O)[O-])[N+](=O)[O-])c([N+](=O)[O-])n1	445.15	473.522	1.84	1.88016
501	Nc1n[n+]([O-])c2nonc2c1[N+](=O)[O-]	448.15	491.285	1.84	2.0152
502	[N-]=[N+]=Nc1nonc1-c1n[nH]c(-c2nc(-c3nonc3N=[N+]=[N-])n[nH]2)n1	452.15	480.68	1.84	1.94775
503	O=C(OCC([N+](=O)[O-])([N+](=O)[O-])[N+](=O)[O-])C(=O)OCC([N+](=O)[O-])([N+](=O)[O-])[N+](=O)[O-]	459.15	451.605	1.84	1.7586
504	O=[N+]([O-])C(CNc1nonc1/N=[N+](/[O-])c1nonc1NCC([N+](=O)[O-])([N+](=O)[O-])[N+](=O)[O-])([N+](=O)[O-])[N+](=O)[O-]	463.35	467.229	1.84	1.9753
505	O=C(C=CC(=O)OCC(F)([N+](=O)[O-])[N+](=O)[O-])OCC(F)([N+](=O)[O-])[N+](=O)[O-]	463.85	445.942	1.84	1.64686
506	N#Cc1n[n+]([O-])c(N)[n+]([O-])n1	464.15	494.446	1.84	1.94548
507	O=[N+]([O-])C(F)(COC(OCC(F)([N+](=O)[O-])[N+](=O)[O-])(OCC(F)([N+](=O)[O-])[N+](=O)[O-])OCC(F)([N+](=O)[O-])[N+](=O)[O-])[N+](=O)[O-]	466.15	440.261	1.84	1.78604
508	O=[N+]([O-])OC12CC3N([N+](=O)[O-])C(C1)N([N+](=O)[O-])C(C2)N3[N+](=O)[O-]	471.15	459.917	1.84	1.70464
509	O=[N+]([O-])Cn1nc([N+](=O)[O-])c([N+](=O)[O-])c1[N+](=O)[O-]	475.15	464.277	1.84	1.89692
510	O=[N+]([O-])c1noc(Nc2nnc(Nc3nc([N+](=O)[O-])no3)nn2)n1	477.15	485.429	1.84	1.92584
511	Nc1n[n+]([O-])c([N+](=O)[O-])c(N)c1[N+](=O)[O-]	488.15	499.916	1.84	1.93561
512	[N-]=[N+]=Nc1nn2c([N+](=O)[O-])nnc2c([N+](=O)[O-])c1N	490.15	462.821	1.84	2.03814
513	O=[N+]([O-])c1cnn(N=Nn2ncc([N+](=O)[O-])n2)n1	500.15	458.951	1.84	1.88573
514	O=[N+]([O-])C(c1nnn[nH]1)c1nnn[nH]1	511.15	495.97	1.84	2.00709
515	O=[N+]([O-])c1n[nH]c(-c2[nH]nc([N+](=O)[O-])c2[N+](=O)[O-])c1[N+](=O)[O-]	516.15	485.705	1.84	1.9471
516	Nc1c([N+](=O)[O-])c(N)[n+]([O-])c(N)[n+]1[O-]	549.15	506.868	1.84	1.93971
517	O=[N+]([O-])c1cn([N+](=O)[O-])nc1-c1nnc(-c2nnc(-c3nn([N+](=O)[O-])cc3[N+](=O)[O-])o2)o1	459.15	476.889	1.844	2.02457
518	O=[N+]([O-])c1nnn(COCn2nnc([N+](=O)[O-])n2)n1	476.15	456.945	1.846	1.91673
519	O=[N+]([O-])c1nc2nc(C(F)(F)F)cc(C(F)(F)F)n2n1	492.15	472.195	1.848	1.79606
520	O=[N+]([O-])N1CN=C(C(Cl)([N+](=O)[O-])[N+](=O)[O-])NC1	425.15	462.81	1.849	1.9338
521	[N-]=[N+]=Nc1nc(N=[N+]=[N-])nc(N[N+](=O)[O-])n1	448.15	467.736	1.849	1.75799
522	O=[N+]([O-])C(CNc1nnn[nH]1)([N+](=O)[O-])[N+](=O)[O-]	423.15	464.022	1.85	2.01246
523	O=[N+]([O-])N(CC(F)([N+](=O)[O-])[N+](=O)[O-])CC([N+](=O)[O-])([N+](=O)[O-])[N+](=O)[O-]	435.15	467.232	1.85	1.74753
524	Nc1nc(-c2c([N+](=O)[O-])no[n+]2[O-])no1	449.15	480.9	1.85	1.94559
525	[N-]=[N+]=Nc1nonc1Oc1nonc1[N+](=O)[O-]	455.45	460.008	1.85	1.79603
526	O=[N+]([O-])c1cn([N+](=O)[O-])nc1-c1nn([N+](=O)[O-])cc1[N+](=O)[O-]	479.15	460.464	1.85	1.98416
527	O=[N+]([O-])N=C1N[C@@H]2[C@H](N1)N([N+](=O)[O-])CN2[N+](=O)[O-]	480.15	473.917	1.85	2.0431
528	O=[N+]([O-])c1n[nH]c([N+](=O)[O-])c1/N=N/c1c([N+](=O)[O-])n[nH]c1[N+](=O)[O-]	494.15	464.549	1.85	1.96679
529	NC(=N/N=C/C=N/N=C(\N)C([N+](=O)[O-])[N+](=O)[O-])C([N+](=O)[O-])[N+](=O)[O-]	498.75	488.609	1.85	1.96606
530	O=[N+]([O-])N1CC([N+](=O)[O-])([N+](=O)[O-])C1	499.15	467.197	1.85	1.68941
531	Nc1nnc(Nc2c([N+](=O)[O-])cc([N+](=O)[O-])cc2[N+](=O)[O-])[nH]1	534.15	495.249	1.85	1.84561
532	Nc1nc(-c2nonc2/N=N\c2nonc2-c2noc(N)n2)no1	540.15	515.676	1.85	1.92223
533	[N-]=[N+]=NCN1[C@H]2[C@H]3N(CN=[N+]=[N-])[C@H]4[C@@H]1N([N+](=O)[O-])C(C(N2[N+](=O)[O-])N3[N+](=O)[O-])N4[N+](=O)[O-]	452.15	455.814	1.854	1.83056
534	O=[N+]([O-])N1CN=C2N(C1)CN([N+](=O)[O-])CC2([N+](=O)[O-])[N+](=O)[O-]	449.15	468.032	1.858	1.88773
535	O=[N+]([O-])N=c1[nH]nnn1CCn1nn[nH]c1=N[N+](=O)[O-]	467.15	480.292	1.858	2.00074
536	O=[N+]([O-])c1cc(-c2cc([N+](=O)[O-])nn2[N+](=O)[O-])n([N+](=O)[O-])n1	425.15	459.68	1.86	1.96019
537	O=[N+]([O-])c1nn(Cc2nnn[nH]2)c([N+](=O)[O-])c1[N+](=O)[O-]	428.15	468.42	1.86	1.99189
538	[C-]#[N+]c1nonc1N(CC([N+](=O)[O-])([N+](=O)[O-])[N+](=O)[O-])[N+](=O)[O-]	429.15	454.713	1.86	1.91753
539	O=C(NC(=O)OCC([N+](=O)[O-])([N+](=O)[O-])[N+](=O)[O-])NC(=O)OCC([N+](=O)[O-])([N+](=O)[O-])[N+](=O)[O-]	442.15	446.67	1.86	1.84138
540	O=[N+]([O-])c1n[nH]c([N+](=O)[O-])c1O	445.15	470.801	1.86	1.95387
541	O=[N+]([O-])N=c1[nH]nc(-c2noc(N[N+](=O)[O-])n2)o1	449.15	462.198	1.86	2.02
542	O=[N+]([O-])c1nc(-c2nonc2[N+](=O)[O-])n[nH]1	464.3	474.243	1.86	2.02021
543	O=[N+]([O-])C(CNc1nonc1Nc1nnc(Nc2nonc2NCC([N+](=O)[O-])([N+](=O)[O-])[N+](=O)[O-])nn1)([N+](=O)[O-])[N+](=O)[O-]	477.15	462.557	1.86	2.01966
544	NC(=O)NC(N)=C([N+](=O)[O-])[N+](=O)[O-]	482.15	496.153	1.86	1.91441
545	Nc1c([N+](=O)[O-])nn(CN(Cn2nc([N+](=O)[O-])c(N)c2[N+](=O)[O-])[N+](=O)[O-])c1[N+](=O)[O-]	483.15	468.172	1.86	1.98486
546	O=[N+]([O-])N1[C@@H]2[C@@H]3N(CC([N+](=O)[O-])([N+](=O)[O-])[N+](=O)[O-])[C@H]4[C@H]1N([N+](=O)[O-])[C@H]([C@H](N2[N+](=O)[O-])N3[N+](=O)[O-])N4[N+](=O)[O-]	485.15	454.871	1.86	1.78171
547	[O-][n+]1onc2c1-c1nonc1N=Nc1nonc1-c1no[n+]([O-])c1-c1nonc1N=Nc1nonc1-2	488.35	506.735	1.86	2.04165
548	O=C1N[C@H]2[C@H](N1[N+](=O)[O-])N([N+](=O)[O-])[C@H]1[C@@H](NC(=O)N1[N+](=O)[O-])N2[N+](=O)[O-]	498.15	470.257	1.86	2.00254
549	O=[N+]([O-])N1CN([N+](=O)[O-])C2C1N([N+](=O)[O-])CN2[N+](=O)[O-]	500.15	471.437	1.86	1.8158
550	O=[N+]([O-])c1n[nH]c(-c2n[nH]nc2[N+](=O)[O-])n1	483.98	482.18	1.861	2.00407
551	O=[N+]([O-])C(F)(c1nonc1/N=N/c1nonc1C(F)([N+](=O)[O-])[N+](=O)[O-])[N+](=O)[O-]	439.15	456.42	1.865	2.04553
552	O=[N+]([O-])c1n[nH]c(-c2n[nH]c(-c3nc([N+](=O)[O-])n[nH]3)c2[N+](=O)[O-])n1	511.35	489.392	1.865	2.06028
553	O=[N+]([O-])c1n[nH]c(-c2n[nH]c(-c3[nH]nc([N+](=O)[O-])c3[N+](=O)[O-])n2)c1[N+](=O)[O-]	527.15	488.585	1.867	2.02439
554	O=[N+]([O-])N1CN=C(C([N+](=O)[O-])([N+](=O)[O-])[N+](=O)[O-])N([N+](=O)[O-])C1	414.35	457.349	1.87	1.86557
555	O=[N+]([O-])N(CC([N+](=O)[O-])([N+](=O)[O-])[N+](=O)[O-])c1nonc1/N=N\c1nonc1N(CC([N+](=O)[O-])([N+](=O)[O-])[N+](=O)[O-])[N+](=O)[O-]	432.15	455.356	1.87	2.03021
556	O=C(CN(CC([N+](=O)[O-])([N+](=O)[O-])[N+](=O)[O-])[N+](=O)[O-])OCC([N+](=O)[O-])([N+](=O)[O-])[N+](=O)[O-]	456.15	454.117	1.87	1.76736
557	CN(Cn1nnc(C(F)([N+](=O)[O-])[N+](=O)[O-])n1)[N+](=O)[O-]	457.15	461.021	1.87	1.8292
558	O=C(NCC([N+](=O)[O-])([N+](=O)[O-])[N+](=O)[O-])OCC([N+](=O)[O-])([N+](=O)[O-])[N+](=O)[O-]	459.15	459.059	1.87	1.77102
559	Nc1c([N+](=O)[O-])nc([N+](=O)[O-])n1N	463.35	489.507	1.87	2.03828
560	O=[N+]([O-])c1noc(Nc2nnc(Nc3nc([N+](=O)[O-])no3)[n+]([O-])n2)n1	501.15	485.801	1.87	2.01567
561	O=[N+]([O-])N=c1[nH]c(Cn2nn[nH]c2=N[N+](=O)[O-])no1	448.15	468.985	1.874	1.99329
562	Cn1nc(C([N+](=O)[O-])([N+](=O)[O-])[N+](=O)[O-])nc1[N+](=O)[O-]	426.15	463.401	1.88	1.8716
563	O=[N+]([O-])C(F)(c1nc(Cc2noc(C(F)([N+](=O)[O-])[N+](=O)[O-])n2)no1)[N+](=O)[O-]	439.15	450.21	1.88	1.88037
564	O=[N+]([O-])C(COc1nc(OCC([N+](=O)[O-])([N+](=O)[O-])[N+](=O)[O-])nc(C([N+](=O)[O-])([N+](=O)[O-])[N+](=O)[O-])n1)([N+](=O)[O-])[N+](=O)[O-]	442.65	456.524	1.88	1.90047
565	O=[N+]([O-])C(CNc1nc(NCC([N+](=O)[O-])([N+](=O)[O-])[N+](=O)[O-])nc(NCC([N+](=O)[O-])([N+](=O)[O-])[N+](=O)[O-])n1)([N+](=O)[O-])[N+](=O)[O-]	459.15	474.081	1.88	1.95154
566	NC(=O)c1c(/N=N/c2no[n+]([O-])c2C(N)=O)no[n+]1[O-]	461.15	487.599	1.88	1.96547
567	O=[N+]([O-])c1no[n+]([O-])c1-c1nnc(N=Nc2nnc(-c3c([N+](=O)[O-])no[n+]3[O-])o2)o1	467.15	490.033	1.88	2.034
568	O=[N+]([O-])C(F)(c1nonc1Oc1nonc1Oc1nonc1C(F)([N+](=O)[O-])[N+](=O)[O-])[N+](=O)[O-]	470.95	450.818	1.88	1.99336
569	O=[N+]([O-])Nc1nc([N+](=O)[O-])no1	492.15	458.494	1.88	1.82576
570	Nc1c([N+](=O)[O-])nn(N)c1[N+](=O)[O-]	514.15	489.783	1.88	1.9886
571	O=[N+]([O-])c1nn(C([N+](=O)[O-])([N+](=O)[O-])[N+](=O)[O-])c(-c2n[nH]c([N+](=O)[O-])c2[N+](=O)[O-])c1[N+](=O)[O-]	423.15	459.434	1.882	2.07009
572	O=[N+]([O-])c1nonc1C1=NOC(c2nonc2[N+](=O)[O-])=NO1	469.81	466.012	1.883	1.95084
573	O=[N+]([O-])c1nonc1-c1nc(C(F)([N+](=O)[O-])[N+](=O)[O-])n[nH]1	440.15	459.922	1.884	2.07972
574	NC(=N[N+](=O)[O-])N[N+](=O)[O-]	455.98	490.159	1.884	1.84297
575	O=[N+]([O-])C(COB(OCC([N+](=O)[O-])([N+](=O)[O-])[N+](=O)[O-])OCC([N+](=O)[O-])([N+](=O)[O-])[N+](=O)[O-])([N+](=O)[O-])[N+](=O)[O-]	423.15	452.781	1.885	1.78811
576	O=[N+]([O-])C(CNc1nonc1/[N+]([O-])=N\c1nonc1Cl)([N+](=O)[O-])[N+](=O)[O-]	482.35	458.529	1.887	1.98121
577	O=[N+]([O-])C(c1n[nH]c(-c2nc(C([N+](=O)[O-])([N+](=O)[O-])[N+](=O)[O-])n[nH]2)n1)([N+](=O)[O-])[N+](=O)[O-]	421.15	462.272	1.89	2.0495
578	O=[N+]([O-])C(c1ncn(C([N+](=O)[O-])([N+](=O)[O-])[N+](=O)[O-])n1)([N+](=O)[O-])[N+](=O)[O-]	430.15	455.094	1.89	1.94403
579	O=C(OCC([N+](=O)[O-])([N+](=O)[O-])[N+](=O)[O-])N(CCN(CC([N+](=O)[O-])([N+](=O)[O-])[N+](=O)[O-])[N+](=O)[O-])[N+](=O)[O-]	430.15	455.58	1.89	1.7826
580	O=c1[nH]c(-c2nonc2NCC([N+](=O)[O-])([N+](=O)[O-])[N+](=O)[O-])no1	434.98	453.929	1.89	2.0394
581	O=c1nc(OCC([N+](=O)[O-])([N+](=O)[O-])[N+](=O)[O-])nc(OCC([N+](=O)[O-])([N+](=O)[O-])[N+](=O)[O-])[nH]1	440.75	451.222	1.89	1.98336
582	O=[N+]([O-])c1ccc(Nc2c([N+](=O)[O-])cc([N+](=O)[O-])c3no[n+]([O-])c23)cc1	443.15	487.233	1.89	1.76158
583	O=C(N[N+](=O)[O-])OCC(COC(=O)N[N+](=O)[O-])([N+](=O)[O-])C(COC(=O)N[N+](=O)[O-])(COC(=O)N[N+](=O)[O-])[N+](=O)[O-]	445.15	436.996	1.89	1.78278
584	Nc1c([N+](=O)[O-])c([N+](=O)[O-])nn2nnnc12	475.15	468.81	1.89	2.0825
585	O=C(OCC(F)([N+](=O)[O-])[N+](=O)[O-])c1cc(C(=O)OCC(F)([N+](=O)[O-])[N+](=O)[O-])c([N+](=O)[O-])cc1[N+](=O)[O-]	481.45	452.903	1.89	1.76039
586	Nc1c([N+](=O)[O-])nn(-c2c([N+](=O)[O-])n[nH]c2[N+](=O)[O-])c1[N+](=O)[O-]	515.15	474.869	1.89	2.03321
587	O=[N+]([O-])N=c1[nH]nnn1OCOn1nn[nH]c1=N[N+](=O)[O-]	430.15	470.313	1.9	2.01659
588	O=C(OCC([N+](=O)[O-])([N+](=O)[O-])[N+](=O)[O-])N(CN(CC([N+](=O)[O-])([N+](=O)[O-])[N+](=O)[O-])[N+](=O)[O-])[N+](=O)[O-]	434.15	461.648	1.9	1.78056
589	Nc1c([N+](=O)[O-])n[nH]c1[N+](=O)[O-]	451.15	478.692	1.9	1.85254
590	[N-]=[N+]=Nc1nonc1-c1nn[nH]n1	458.75	482.351	1.9	1.8965
591	O=[N+]([O-])C(CNc1nonc1-c1noc(-c2nc(-c3nonc3NCC([N+](=O)[O-])([N+](=O)[O-])[N+](=O)[O-])no2)n1)([N+](=O)[O-])[N+](=O)[O-]	460.85	456.954	1.9	1.99124
592	O=c1[nH]c(-c2c(/N=N/c3no[n+]([O-])c3-c3noc(=O)[nH]3)no[n+]2[O-])no1	462.15	504.087	1.9	2.05517
593	O=C(OCC(F)([N+](=O)[O-])[N+](=O)[O-])C(=O)OCC(F)([N+](=O)[O-])[N+](=O)[O-]	480.85	446.784	1.9	1.72287
594	O=[N+]([O-])c1nc([N+](=O)[O-])n(CN(Cn2nc([N+](=O)[O-])nc2[N+](=O)[O-])[N+](=O)[O-])n1	482.15	455.645	1.9	1.99657
595	O=[N+]([O-])Nc1nnc(-c2nc(-c3noc(-c4nnc(N[N+](=O)[O-])o4)n3)no2)o1	488.15	482.199	1.9	1.99923
596	Nc1nc2c([N+](=O)[O-])nnn2nc1Cl	491.15	479.639	1.9	2.07552
597	[O-][n+]1onc2c1-c1nonc1Oc1nonc1-2	523.15	499.641	1.9	2.04905
598	O=[N+]([O-])c1n[nH]c(-c2nc([N+](=O)[O-])n[nH]2)n1	524.15	480.128	1.9	1.9768
599	O=[N+]([O-])N1[C@@H]2[C@H]3N(CC(F)([N+](=O)[O-])[N+](=O)[O-])[C@@H]4[C@H]1N([N+](=O)[O-])[C@H]([C@H](N2[N+](=O)[O-])N3[N+](=O)[O-])N4[N+](=O)[O-]	493.15	455.34	1.902	1.78601
600	O=[N+]([O-])N1[C@@H]2[C@@H]3N(CC([N+](=O)[O-])([N+](=O)[O-])[N+](=O)[O-])[C@@H]4[C@H]1N([N+](=O)[O-])[C@H]([C@H](N2[N+](=O)[O-])N3[N+](=O)[O-])N4[N+](=O)[O-]	496.15	454.871	1.906	1.78171
601	Nc1c([N+](=O)[O-])c(N)c([N+](=O)[O-])c(-n2cc([N+](=O)[O-])nc2[N+](=O)[O-])c1[N+](=O)[O-]	526.15	486.412	1.906	1.96161
602	[N-]=[N+]=Nc1nc(CC(=O)O)n[nH]1	431.45	438.99	1.91	1.72235
603	O=[N+]([O-])c1nonc1N=[N+]([O-])c1nonc1[N+](=O)[O-]	433.15	460.523	1.91	1.94086
604	O=[N+]([O-])C(CNc1nc(-c2nonc2NCC([N+](=O)[O-])([N+](=O)[O-])[N+](=O)[O-])n[nH]1)([N+](=O)[O-])[N+](=O)[O-]	441.16	472.275	1.91	2.00377
605	O=[N+]([O-])c1cc([N+](=O)[O-])c(-n2c([N+](=O)[O-])nc([N+](=O)[O-])c2[N+](=O)[O-])c([N+](=O)[O-])c1	448.15	456.245	1.91	1.91341
606	O=C(Nc1c([N+](=O)[O-])c(F)c(F)c(F)c1[N+](=O)[O-])Nc1c([N+](=O)[O-])c(F)c(F)c(F)c1[N+](=O)[O-]	481.05	488.129	1.91	1.86152
607	O=[N+]([O-])c1cc([N+](=O)[O-])c([N+](=O)[O-])c([N+](=O)[O-])c1[N+](=O)[O-]	493.15	468.895	1.91	1.80854
608	O=[N+]([O-])N(CC([N+](=O)[O-])([N+](=O)[O-])[N+](=O)[O-])c1nonc1Nc1nnc(Nc2nonc2N(CC([N+](=O)[O-])([N+](=O)[O-])[N+](=O)[O-])[N+](=O)[O-])nn1	417.15	457.666	1.92	2.11675
609	O=[N+]([O-])N(CC([N+](=O)[O-])([N+](=O)[O-])[N+](=O)[O-])c1nonc1/N=[N+](/[O-])c1nonc1N(CC([N+](=O)[O-])([N+](=O)[O-])[N+](=O)[O-])[N+](=O)[O-]	417.75	457.829	1.92	2.03798
610	O=[N+]([O-])c1nonc1-c1no[n+]([O-])c1[N+](=O)[O-]	419.15	457.414	1.92	1.98753
611	O=[N+]([O-])c1nc(-c2ncn(C([N+](=O)[O-])([N+](=O)[O-])[N+](=O)[O-])n2)n(C([N+](=O)[O-])([N+](=O)[O-])[N+](=O)[O-])n1	425.15	453.282	1.92	2.09622
612	O=[N+]([O-])c1no[n+]([O-])c1-c1noc(/N=N/c2nc(-c3c([N+](=O)[O-])no[n+]3[O-])no2)n1	453.15	485.29	1.92	2.01664
613	O=C(NC(=O)OCC([N+](=O)[O-])([N+](=O)[O-])[N+](=O)[O-])OCC([N+](=O)[O-])([N+](=O)[O-])[N+](=O)[O-]	456.15	447.921	1.92	1.78503
614	O=[N+]([O-])c1nn(Cc2nnn[nH]2)c([N+](=O)[O-])c1Cl	520.15	476.809	1.92	1.96368
615	O=[N+]([O-])c1nonc1-c1noc(N=Nc2nc(-c3nonc3[N+](=O)[O-])no2)n1	529.15	488.742	1.92	1.9497
616	O=[N+]([O-])c1nn(C([N+](=O)[O-])([N+](=O)[O-])[N+](=O)[O-])nc1-c1nn(C([N+](=O)[O-])([N+](=O)[O-])[N+](=O)[O-])nc1[N+](=O)[O-]	468.15	456.347	1.921	2.09256
617	O=[N+]([O-])c1ncn(C([N+](=O)[O-])([N+](=O)[O-])[N+](=O)[O-])n1	431.45	449.596	1.922	1.9597
618	CC12N([N+](=O)[O-])C(=O)N([N+](=O)[O-])C1(C)N([N+](=O)[O-])C(=O)N2[N+](=O)[O-]	441.15	460.368	1.922	1.91528
619	[O-][n+]1onc2c1-c1nonc1Nc1nonc1-2	544.65	505.409	1.924	2.05473
620	O=[N+]([O-])c1cc([N+](=O)[O-])c(Nc2c([N+](=O)[O-])c3no[n+]([O-])c3c3no[n+]([O-])c23)c([N+](=O)[O-])c1Nc1c([N+](=O)[O-])c2no[n+]([O-])c2c2no[n+]([O-])c12	482.35	498.556	1.925	2.09962
621	O=NN1CN([N+](=O)[O-])CN=C1C(Cl)([N+](=O)[O-])[N+](=O)[O-]	414.15	452.295	1.926	1.97342
622	O=[N+]([O-])N(CC([N+](=O)[O-])([N+](=O)[O-])[N+](=O)[O-])c1nonc1-c1noc(-c2nc(-c3nonc3N(CC([N+](=O)[O-])([N+](=O)[O-])[N+](=O)[O-])[N+](=O)[O-])no2)n1	424.95	450.504	1.93	2.05991
623	O=C1N([N+](=O)[O-])CN([N+](=O)[O-])CN1[N+](=O)[O-]	464.15	464.877	1.93	1.93218
624	Cn1c([N+](=O)[O-])c([N+](=O)[O-])c([N+](=O)[O-])c1[N+](=O)[O-]	469.15	469.678	1.93	1.7601
625	Nc1c([N+](=O)[O-])c2no[n+]([O-])c2c2no[n+]([O-])c12	473.15	501.503	1.93	2.03724
626	Nn1c(-c2nc([N+](=O)[O-])c([N+](=O)[O-])n2N)nc([N+](=O)[O-])c1[N+](=O)[O-]	490.15	488.349	1.93	2.06594
627	Nc1nn2c([N+](=O)[O-])nnc2c([N+](=O)[O-])c1N	507.15	486.485	1.93	2.0799
628	O=C1N[C@H]2[C@H](N1[N+](=O)[O-])N([N+](=O)[O-])[C@@H]1NC(=O)N([N+](=O)[O-])[C@H]1N2[N+](=O)[O-]	514.15	470.37	1.93	2.00645
629	O=[N+]([O-])c1cc([N+](=O)[O-])n(C(F)([N+](=O)[O-])[N+](=O)[O-])n1	445.15	457.74	1.931	1.93686
630	O=[N+]([O-])c1nonc1-c1c([N+](=O)[O-])no[n+]1[O-]	413.15	457.11	1.934	1.96787
631	O=[N+]([O-])c1nn(Cn2nc([N+](=O)[O-])c([N+](=O)[O-])c2[N+](=O)[O-])c([N+](=O)[O-])c1[N+](=O)[O-]	478.15	458.505	1.934	1.99035
632	Nc1nc(N)c([N+](=O)[O-])[n+]([O-])c1[N+](=O)[O-]	488.15	498.205	1.935	1.91936
633	O=[N+]([O-])c1cc([N+](=O)[O-])n(C([N+](=O)[O-])([N+](=O)[O-])[N+](=O)[O-])n1	416.15	459.819	1.937	1.94645
634	O=[N+]([O-])N(CC(F)([N+](=O)[O-])[N+](=O)[O-])c1nonc1N(CC(F)([N+](=O)[O-])[N+](=O)[O-])[N+](=O)[O-]	453.15	456.526	1.94	1.95147
635	O=[N+]([O-])C(CNc1nonc1C1=NOC(c2nonc2NCC([N+](=O)[O-])([N+](=O)[O-])[N+](=O)[O-])=NO1)([N+](=O)[O-])[N+](=O)[O-]	476.15	460.447	1.94	1.98326
636	FC(F)(F)c1nc(-c2nonc2/N=N\c2nonc2-c2noc(C(F)(F)F)n2)no1	513.15	476.297	1.94	1.77851
637	O=C(c1nc([N+](=O)[O-])nn1C([N+](=O)[O-])([N+](=O)[O-])[N+](=O)[O-])c1nc([N+](=O)[O-])nn1C([N+](=O)[O-])([N+](=O)[O-])[N+](=O)[O-]	437.15	452.31	1.945	2.12522
638	n1n[nH]c(-c2nc(-c3nnn[nH]3)c(-c3nnn[nH]3)nc2-c2nnn[nH]2)n1	533.15	521.224	1.945	1.99771
639	Nc1c([N+](=O)[O-])nnc2c([N+](=O)[O-])c([N+](=O)[O-])nn12	519.15	482.421	1.946	2.07898
640	O=[N+]([O-])C(Cl)(/C(N=N/C(=N/Cl)C(Cl)([N+](=O)[O-])[N+](=O)[O-])=N\Cl)[N+](=O)[O-]	410.85	452.347	1.95	1.85588
641	O=[N+]([O-])c1nn([N+](=O)[O-])c2c([N+](=O)[O-])nn([N+](=O)[O-])c12	418.15	455.781	1.95	2.12646
642	O=[N+]([O-])c1nc(-c2nc([N+](=O)[O-])nn2C([N+](=O)[O-])[N+](=O)[O-])n(C([N+](=O)[O-])[N+](=O)[O-])n1	439.15	457.754	1.95	2.14162
643	O=C1N([N+](=O)[O-])[C@H]2[C@H](N1[N+](=O)[O-])N([N+](=O)[O-])[C@H]1[C@@H](NC(=O)N1[N+](=O)[O-])N2[N+](=O)[O-]	507.15	468.037	1.95	1.99024
644	Nc1c([N+](=O)[O-])c(N)[n+]([O-])c(=O)n1O	544.15	513.519	1.95	1.97101
645	O=[N+]([O-])N1CN=C(C(Cl)([N+](=O)[O-])[N+](=O)[O-])N([N+](=O)[O-])C1	410.15	454.27	1.955	1.91281
646	O=[N+]([O-])C(F)(c1nc(-c2noc(C(F)([N+](=O)[O-])[N+](=O)[O-])n2)no1)[N+](=O)[O-]	424.15	461.522	1.96	1.99404
647	O=[N+]([O-])C(Cl)(C(=NCl)/N=N/C(=N/Cl)C(Cl)([N+](=O)[O-])[N+](=O)[O-])[N+](=O)[O-]	412.15	452.347	1.97	1.85588
648	O=[N+]([O-])C(Cl)(/C(N=N/C(=N\Cl)C(Cl)([N+](=O)[O-])[N+](=O)[O-])=N/Cl)[N+](=O)[O-]	412.15	452.347	1.97	1.85588
649	O=[N+]([O-])C(c1nc(C([N+](=O)[O-])([N+](=O)[O-])[N+](=O)[O-])n[nH]1)[N+](=O)[O-]	416.15	459.961	1.97	1.9783
650	[N-]=[N+]=NC(=O)N1[C@H]2[C@@H]3N(C(=O)N=[N+]=[N-])[C@@H]4[C@H]1N([N+](=O)[O-])C(C(N2[N+](=O)[O-])N3[N+](=O)[O-])N4[N+](=O)[O-]	463.15	455.466	1.97	1.88593
651	[N-]=[N+]=NC(=O)N1[C@@H]2[C@H]3N([N+](=O)[O-])[C@H]4[C@@H]1N([N+](=O)[O-])[C@@H]([C@H](N3[N+](=O)[O-])N2[N+](=O)[O-])N4[N+](=O)[O-]	483.15	457.076	1.97	1.81176
652	O=[N+]([O-])N=c1[nH]nc(-c2n[nH]/c(=N\[N+](=O)[O-])o2)o1	473.15	459.573	1.98	2.00054
653	O=C1N[C@H]2[C@@H](NC(=O)N2[N+](=O)[O-])N1[N+](=O)[O-]	498.15	478.001	1.98	2.08456
654	O=[N+]([O-])c1c(/N=N\c2c([N+](=O)[O-])c([N+](=O)[O-])c(Nc3nnn[nH]3)c([N+](=O)[O-])c2[N+](=O)[O-])c([N+](=O)[O-])c([N+](=O)[O-])c(Nc2nnn[nH]2)c1[N+](=O)[O-]	541.15	496.905	1.98	2.08566
655	O=[N+]([O-])c1nn(C([N+](=O)[O-])([N+](=O)[O-])[N+](=O)[O-])c2c([N+](=O)[O-])nn(C([N+](=O)[O-])([N+](=O)[O-])[N+](=O)[O-])c12	433.15	453.005	1.997	2.13271
656	O=[N+]([O-])c1c(/N=N\c2no[n+]([O-])c2[N+](=O)[O-])no[n+]1[O-]	422.15	462.613	2.002	2.02001
657	O=[N+]([O-])C([N+](=O)[O-])([N+](=O)[O-])[N+]([O-])=Nc1nonc1N=[N+]([O-])c1nonc1N=[N+]([O-])C([N+](=O)[O-])([N+](=O)[O-])[N+](=O)[O-]	456.75	454.907	2.01	2.07401
658	O=[N+]([O-])c1nn(C([N+](=O)[O-])([N+](=O)[O-])[N+](=O)[O-])c(-c2c([N+](=O)[O-])c([N+](=O)[O-])nn2C([N+](=O)[O-])([N+](=O)[O-])[N+](=O)[O-])c1[N+](=O)[O-]	409.55	452.522	2.02	2.0805
659	O=C1N([N+](=O)[O-])[C@H]2[C@H](N1[N+](=O)[O-])N([N+](=O)[O-])[C@H]1[C@@H](N([N+](=O)[O-])C(=O)N1[N+](=O)[O-])N2[N+](=O)[O-]	501.15	466.443	2.04	1.95772
660	Nc1c([N+](=O)[O-])c(O)c([N+](=O)[O-])c(O)c1[N+](=O)[O-]	478.15	489.504	2.078	1.88712
661	O=[N+]([O-])C(Br)(C(=NCl)/N=N/C(=N/Cl)C(Br)([N+](=O)[O-])[N+](=O)[O-])[N+](=O)[O-]	409.15	442.198	2.08	2.09754
